# Supplementary material for: The Oligostilbene Gnetin H Is a Novel Glycolysis Inhibitor That Regulates Thioredoxin Interacting Protein Expression and Synergizes with OXPHOS Inhibitor in Cancer Cells
Source: MDPI journal article supplement (doi:10.3390/ijms24097741), 2023-04-23
Supplement: s1 [file s1]

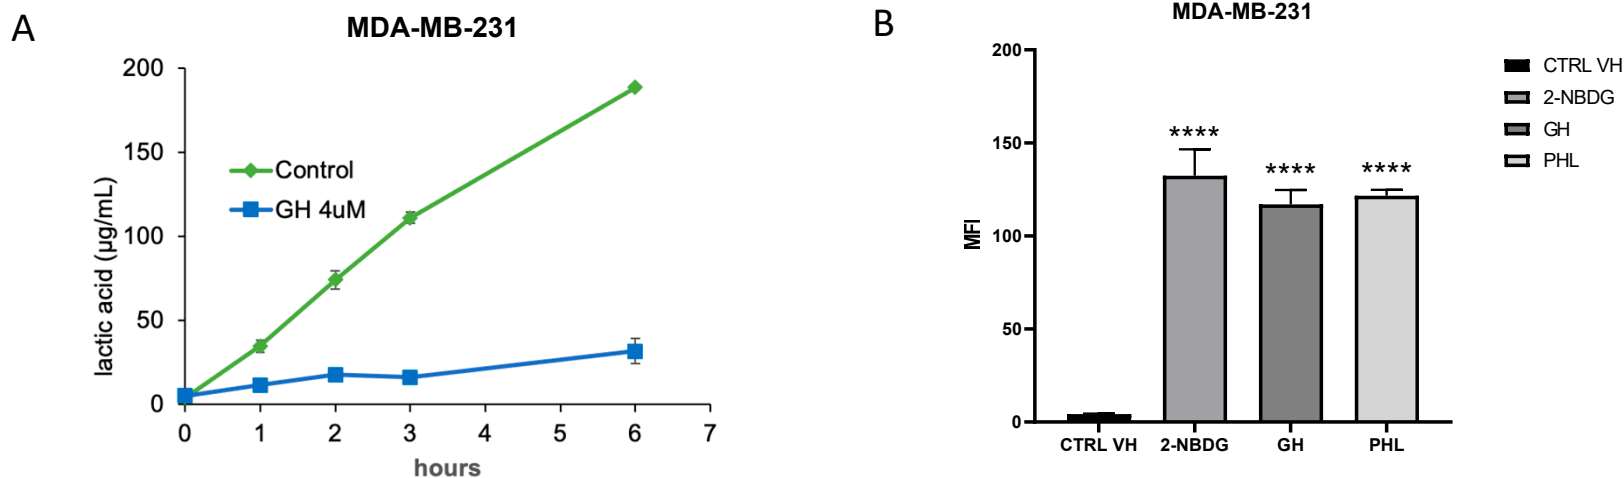

**Supplementary Figure S1. MDA-MB-231 intracellular and extracellular lactic acid production**

**and measurement of glucose transport. Panel A)** MDA-MB-231 cells were treated with 4 $\mu\text{M}$

GH and the level of extracellular lactate was measured by sampling culture medium at 0, 1, 2,

3, and 6 hours. **Panel B)** Flow cytometric analysis of fluorescent glucose analog 2-NBDG

following treatment with 4 $\mu\text{M}$  GH or phloretin, a glucose transporter inhibitor (One-Way

Anova, Dunnet's post test, \*\*\*\* $p < 0.0001$ )

A

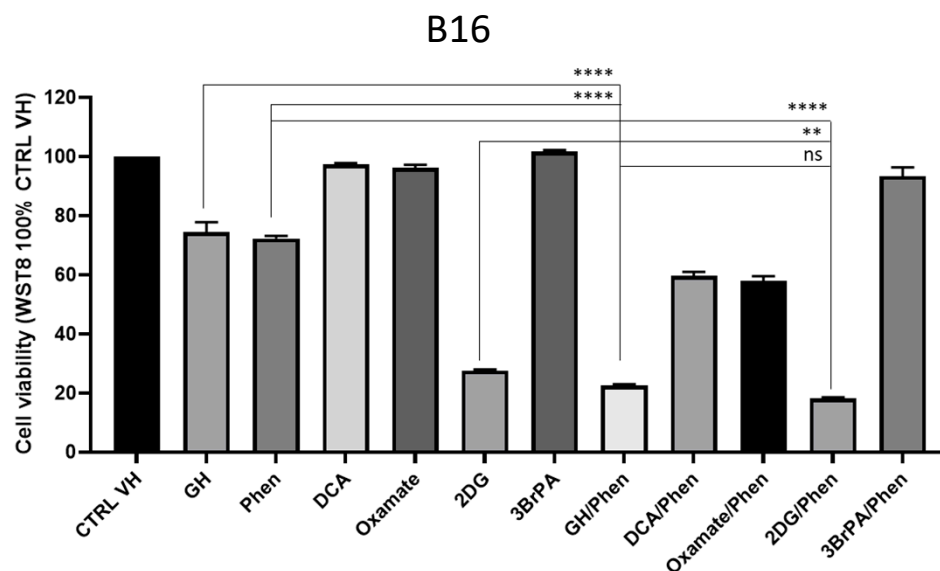

B

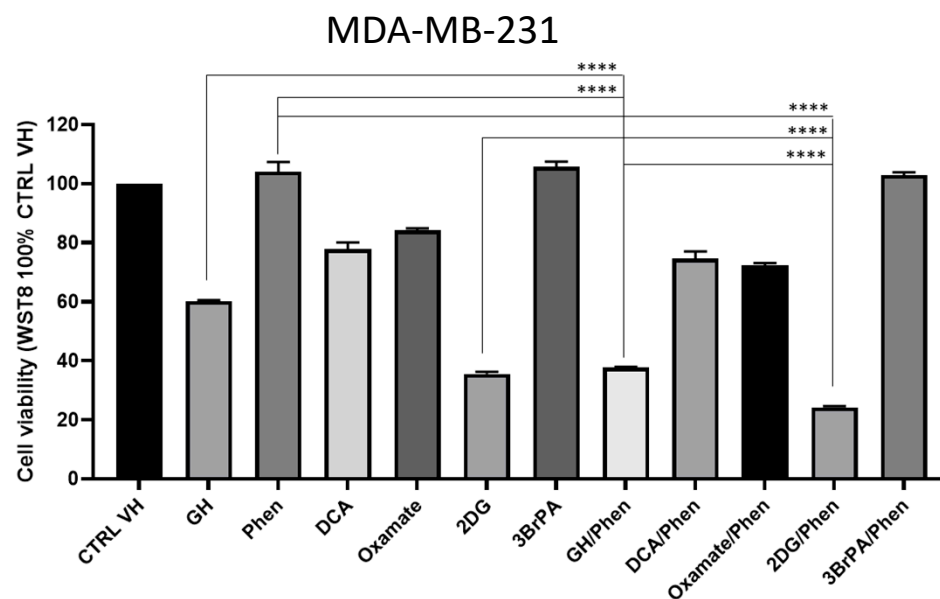

**Supplementary Figure S2. Viability of B16 and MDA-MB231 cells following treatment with GH or other known glycolysis inhibitors in combination or not with mitochondrial complex-I inhibitor Phenformin.**

Panel **A**) B16 or Panel **B**) MDA-MB-231 cells were treated for 48 hours with either 4 $\mu$ M GH or 25mM dichloroacetate (DCA), 25mM Oxamate, 25mM 2-Deoxy-D-glucose (2DG), 25 $\mu$ M 3- bromopyruvate (3BrPA), alone or in combination with 100 $\mu$ M Phenformin.

**Profile of selected Metformin-Responding genes**

| Gene   | Functional Roles <sup>a</sup>                      | Metformin <sup>b</sup> | Phen | 2DG   | GH    | 2DG + Phen | GH + Phen |
|--------|----------------------------------------------------|------------------------|------|-------|-------|------------|-----------|
| ARRDC3 | Protein ubiquitination, GPCR signaling pathway     | Up                     | NC   | NC    | NC    | +2.3       | NC        |
| CHAC1  | Unfolded protein response and ER stress            | Up                     | NC   | +67.1 | NC    | NC         | +13.1     |
| DDIT3  | Unfolded protein response and ER stress            | Up                     | NC   | +5.8  | +2.5  | +2.7       | +3.8      |
| DNAJB9 | Unfolded protein response and ER stress            | Up                     | NC   | NC    | +2.5  | NC         | +2.3      |
| EGR1   | Glucose and insulin response, and Wnt signaling    | Up                     | NC   | NC    | NC    | +4.7       | NC        |
| GDF15  | SMAD, MAPK, and growth hormone signal transduction | Up                     | NC   | +6.3  | NC    | +16.5      | +5.3      |
| JUN    | SMAD and cAMP signal transduction, ER stress       | Up                     | NC   | NC    | NC    | +3.0       | +2.0      |
| ARRDC4 | Glucose uptake, protein ubiquitination             | Down                   | NC   | +3.2  | -5.8  | +2.5       | -5.1      |
| TXNIP  | Glucose uptake, cell cycle regulation              | Down                   | -2.5 | +2.2  | -87.9 | +2.1       | -34.7     |

Up or +, Upregulated

Down or -, Downregulated

NC, No Change

Values represent fold-change with respect to solvent control

<sup>a</sup>Functional roles most relevant to the present study are listed<sup>b</sup>Metformin transcriptional responses are based on Schulten et al. [46]
