# Supplementary material for: The Oligostilbene Gnetin H Is a Novel Glycolysis Inhibitor That Regulates Thioredoxin Interacting Protein Expression and Synergizes with OXPHOS Inhibitor in Cancer Cells
Source: Int J Mol Sci. 2023 Apr 23;24(9):7741. doi: 10.3390/ijms24097741 (PMC10178141; doi:10.3390/ijms24097741)
Supplement: Supplementary file 1 [file ijms-24-07741-s001.zip › ijms-2252267-Table S1-resub.xlsx]

## Sheet: 2DG-UP
Gene_Name	Fold change	Bonferroni p-value	Description
CHAC1	67.0674	0	ChaC glutathione specific gamma-glutamylcyclotransferase 1 [Source:HGNC Symbol;Acc:HGNC:28680]
AC012181.2	20.6687	0
AC012181.3	15.0538	1.36005e-06
GDF15	6.31784	0	growth differentiation factor 15 [Source:HGNC Symbol;Acc:HGNC:30142]
DDIT3	5.76742	0	DNA damage inducible transcript 3 [Source:HGNC Symbol;Acc:HGNC:2726]
ZNF358	5.28134	2.05046e-05	zinc finger protein 358 [Source:HGNC Symbol;Acc:HGNC:16838]
AL139099.5	5.03397	6.73981e-06
MED16	4.80379	2.54035e-07	mediator complex subunit 16 [Source:HGNC Symbol;Acc:HGNC:17556]
STX1A	4.7948	1.22409e-11	syntaxin 1A [Source:HGNC Symbol;Acc:HGNC:11433]
SDF2L1	4.77371	2.90644e-06	stromal cell derived factor 2 like 1 [Source:HGNC Symbol;Acc:HGNC:10676]
ATP5D	4.54372	9.507e-07	ATP synthase, H+ transporting, mitochondrial F1 complex, delta subunit [Source:HGNC Symbol;Acc:HGNC:837]
FBXW5	4.54297	0.000234387	F-box and WD repeat domain containing 5 [Source:HGNC Symbol;Acc:HGNC:13613]
OSGIN1	4.46969	2.43753e-07	oxidative stress induced growth inhibitor 1 [Source:HGNC Symbol;Acc:HGNC:30093]
PLEKHF1	4.27578	2.10604e-08	pleckstrin homology and FYVE domain containing 1 [Source:HGNC Symbol;Acc:HGNC:20764]
CDC42EP1	4.155	1.73208e-09	CDC42 effector protein 1 [Source:HGNC Symbol;Acc:HGNC:17014]
HERPUD1	4.14537	0	homocysteine inducible ER protein with ubiquitin like domain 1 [Source:HGNC Symbol;Acc:HGNC:13744]
ARID5A	4.0604	3.14001e-05	AT-rich interaction domain 5A [Source:HGNC Symbol;Acc:HGNC:17361]
SLC25A10	4.04481	9.86009e-07	solute carrier family 25 member 10 [Source:HGNC Symbol;Acc:HGNC:10980]
NDUFA13	3.87545	0.000183034	NADH:ubiquinone oxidoreductase subunit A13 [Source:HGNC Symbol;Acc:HGNC:17194]
DDIT4	3.81972	0	DNA damage inducible transcript 4 [Source:HGNC Symbol;Acc:HGNC:24944]
BOP1	3.75293	4.55201e-06	block of proliferation 1 [Source:HGNC Symbol;Acc:HGNC:15519]
SESN2	3.74436	0	sestrin 2 [Source:HGNC Symbol;Acc:HGNC:20746]
TELO2	3.69902	0.000396478	telomere maintenance 2 [Source:HGNC Symbol;Acc:HGNC:29099]
CCDC124	3.66764	0.00909816	coiled-coil domain containing 124 [Source:HGNC Symbol;Acc:HGNC:25171]
C19orf48	3.61395	0	chromosome 19 open reading frame 48 [Source:HGNC Symbol;Acc:HGNC:29667]
C19orf24	3.57853	0.0189892	chromosome 19 open reading frame 24 [Source:HGNC Symbol;Acc:HGNC:26073]
POLRMT	3.55824	7.24351e-06	RNA polymerase mitochondrial [Source:HGNC Symbol;Acc:HGNC:9200]
PLEC	3.54916	9.7927e-11	plectin [Source:HGNC Symbol;Acc:HGNC:9069]
COL6A2	3.50298	1.35373e-06	collagen type VI alpha 2 chain [Source:HGNC Symbol;Acc:HGNC:2212]
MVD	3.48975	2.75591e-07	mevalonate diphosphate decarboxylase [Source:HGNC Symbol;Acc:HGNC:7529]
DAPK3	3.46387	0.00834032	death associated protein kinase 3 [Source:HGNC Symbol;Acc:HGNC:2676]
LRFN4	3.44641	0.00687201	leucine rich repeat and fibronectin type III domain containing 4 [Source:HGNC Symbol;Acc:HGNC:28456]
GPSM1	3.42666	3.96484e-05	G protein signaling modulator 1 [Source:HGNC Symbol;Acc:HGNC:17858]
ZBTB17	3.42543	6.50409e-05	zinc finger and BTB domain containing 17 [Source:HGNC Symbol;Acc:HGNC:12936]
TMEM54	3.41115	0.000260293	transmembrane protein 54 [Source:HGNC Symbol;Acc:HGNC:24143]
AIP	3.39793	1.73516e-05	aryl hydrocarbon receptor interacting protein [Source:HGNC Symbol;Acc:HGNC:358]
RPUSD1	3.37222	0.0216609	RNA pseudouridylate synthase domain containing 1 [Source:HGNC Symbol;Acc:HGNC:14173]
FASN	3.3672	6.35516e-07	fatty acid synthase [Source:HGNC Symbol;Acc:HGNC:3594]
RASSF7	3.35979	0.0333162	Ras association domain family member 7 [Source:HGNC Symbol;Acc:HGNC:1166]
RIN1	3.34143	7.28456e-06	Ras and Rab interactor 1 [Source:HGNC Symbol;Acc:HGNC:18749]
NDUFA11	3.33725	0.00411306	NADH:ubiquinone oxidoreductase subunit A11 [Source:HGNC Symbol;Acc:HGNC:20371]
SBNO2	3.33419	3.10429e-08	strawberry notch homolog 2 [Source:HGNC Symbol;Acc:HGNC:29158]
AMDHD2	3.31869	0.000687248	amidohydrolase domain containing 2 [Source:HGNC Symbol;Acc:HGNC:24262]
KIFC3	3.30249	4.28431e-10	kinesin family member C3 [Source:HGNC Symbol;Acc:HGNC:6326]
IRX1	3.30035	0.0104505	iroquois homeobox 1 [Source:HGNC Symbol;Acc:HGNC:14358]
BCAR1	3.29808	6.45437e-06	BCAR1, Cas family scaffolding protein [Source:HGNC Symbol;Acc:HGNC:971]
RAB3IL1	3.29737	0.00969525	RAB3A interacting protein like 1 [Source:HGNC Symbol;Acc:HGNC:9780]
SLC16A6	3.29539	0	solute carrier family 16 member 6 [Source:HGNC Symbol;Acc:HGNC:10927]
BCL2L2-PABPN1	3.28303	0.026176	BCL2L2-PABPN1 readthrough [Source:HGNC Symbol;Acc:HGNC:42959]
CPSF1	3.28079	1.63883e-05	cleavage and polyadenylation specific factor 1 [Source:HGNC Symbol;Acc:HGNC:2324]
CLUH	3.27843	1.6464e-09	clustered mitochondria homolog [Source:HGNC Symbol;Acc:HGNC:29094]
C12orf57	3.2626	1.8612e-05	chromosome 12 open reading frame 57 [Source:HGNC Symbol;Acc:HGNC:29521]
DPP7	3.20389	0.00224381	dipeptidyl peptidase 7 [Source:HGNC Symbol;Acc:HGNC:14892]
RECQL4	3.20238	0.000212172	RecQ like helicase 4 [Source:HGNC Symbol;Acc:HGNC:9949]
ARRDC4	3.19751	0	arrestin domain containing 4 [Source:HGNC Symbol;Acc:HGNC:28087]
ENKD1	3.18556	0.000977534	enkurin domain containing 1 [Source:HGNC Symbol;Acc:HGNC:25246]
TSPAN4	3.18283	0.000990144	tetraspanin 4 [Source:HGNC Symbol;Acc:HGNC:11859]
SAC3D1	3.1259	0.000614162	SAC3 domain containing 1 [Source:HGNC Symbol;Acc:HGNC:30179]
DUS3L	3.11729	0.000631927	dihydrouridine synthase 3 like [Source:HGNC Symbol;Acc:HGNC:26920]
CARD10	3.11666	0.00313785	caspase recruitment domain family member 10 [Source:HGNC Symbol;Acc:HGNC:16422]
MLST8	3.11146	4.6367e-06	MTOR associated protein, LST8 homolog [Source:HGNC Symbol;Acc:HGNC:24825]
TCIRG1	3.10413	1.50564e-05	T-cell immune regulator 1, ATPase H+ transporting V0 subunit a3 [Source:HGNC Symbol;Acc:HGNC:11647]
ARSA	3.10272	0.0116513	arylsulfatase A [Source:HGNC Symbol;Acc:HGNC:713]
THEM6	3.09454	0.0167241	thioesterase superfamily member 6 [Source:HGNC Symbol;Acc:HGNC:29656]
ATXN7L2	3.09264	0.000174284	ataxin 7 like 2 [Source:HGNC Symbol;Acc:HGNC:28713]
TRMT61A	3.08942	0.00822074	tRNA methyltransferase 61A [Source:HGNC Symbol;Acc:HGNC:23790]
SMOX	3.08408	4.62411e-07	spermine oxidase [Source:HGNC Symbol;Acc:HGNC:15862]
TOM1	3.08373	5.46786e-06	target of myb1 membrane trafficking protein [Source:HGNC Symbol;Acc:HGNC:11982]
PKN1	3.07458	4.71047e-06	protein kinase N1 [Source:HGNC Symbol;Acc:HGNC:9405]
CTU2	3.0662	0.0446066	cytosolic thiouridylase subunit 2 [Source:HGNC Symbol;Acc:HGNC:28005]
CERS1	3.04814	6.27709e-05	ceramide synthase 1 [Source:HGNC Symbol;Acc:HGNC:14253]
SLC52A2	3.04313	0.000553664	solute carrier family 52 member 2 [Source:HGNC Symbol;Acc:HGNC:30224]
HSPB1	3.03347	0.0109256	heat shock protein family B (small) member 1 [Source:HGNC Symbol;Acc:HGNC:5246]
FLNA	3.02709	1.01599e-09	filamin A [Source:HGNC Symbol;Acc:HGNC:3754]
CD320	3.02534	0.0151488	CD320 molecule [Source:HGNC Symbol;Acc:HGNC:16692]
NDUFA3	3.01996	0.0280066	NADH:ubiquinone oxidoreductase subunit A3 [Source:HGNC Symbol;Acc:HGNC:7686]
RND3	3.01904	0	Rho family GTPase 3 [Source:HGNC Symbol;Acc:HGNC:671]
LMF2	3.01685	4.16222e-05	lipase maturation factor 2 [Source:HGNC Symbol;Acc:HGNC:25096]
RABGGTA	3.00666	0.0270341	Rab geranylgeranyltransferase alpha subunit [Source:HGNC Symbol;Acc:HGNC:9795]
C15orf39	2.99872	1.49369e-07	chromosome 15 open reading frame 39 [Source:HGNC Symbol;Acc:HGNC:24497]
MAPK11	2.99772	9.06071e-06	mitogen-activated protein kinase 11 [Source:HGNC Symbol;Acc:HGNC:6873]
PACSIN3	2.98905	0.000794858	protein kinase C and casein kinase substrate in neurons 3 [Source:HGNC Symbol;Acc:HGNC:8572]
CORO1B	2.98146	0.0260571	coronin 1B [Source:HGNC Symbol;Acc:HGNC:2253]
B4GALT7	2.97649	0.000761005	beta-1,4-galactosyltransferase 7 [Source:HGNC Symbol;Acc:HGNC:930]
SHARPIN	2.96125	0.0212458	SHANK associated RH domain interactor [Source:HGNC Symbol;Acc:HGNC:25321]
POLD1	2.95039	0.000120615	DNA polymerase delta 1, catalytic subunit [Source:HGNC Symbol;Acc:HGNC:9175]
PAFAH1B3	2.94812	0.00133644	platelet activating factor acetylhydrolase 1b catalytic subunit 3 [Source:HGNC Symbol;Acc:HGNC:8576]
RPS9	2.94455	1.99098e-08	ribosomal protein S9 [Source:HGNC Symbol;Acc:HGNC:10442]
CEP131	2.93262	0.00147268	centrosomal protein 131 [Source:HGNC Symbol;Acc:HGNC:29511]
AURKAIP1	2.91801	0.000487529	aurora kinase A interacting protein 1 [Source:HGNC Symbol;Acc:HGNC:24114]
NOC4L	2.91309	0.0198542	nucleolar complex associated 4 homolog [Source:HGNC Symbol;Acc:HGNC:28461]
FAM3A	2.90292	0.000701585	family with sequence similarity 3 member A [Source:HGNC Symbol;Acc:HGNC:13749]
LAMTOR4	2.89644	0.000479345	late endosomal/lysosomal adaptor, MAPK and MTOR activator 4 [Source:HGNC Symbol;Acc:HGNC:33772]
FKBP8	2.89223	0.00160495	FK506 binding protein 8 [Source:HGNC Symbol;Acc:HGNC:3724]
ZGPAT	2.88465	0.000108114	zinc finger CCCH-type and G-patch domain containing [Source:HGNC Symbol;Acc:HGNC:15948]
PEMT	2.88352	1.97827e-06	phosphatidylethanolamine N-methyltransferase [Source:HGNC Symbol;Acc:HGNC:8830]
LIF	2.88082	0	LIF, interleukin 6 family cytokine [Source:HGNC Symbol;Acc:HGNC:6596]
MIF	2.87285	0.0207354	macrophage migration inhibitory factor (glycosylation-inhibiting factor) [Source:HGNC Symbol;Acc:HGNC:7097]
NR1D1	2.86578	8.54346e-07	nuclear receptor subfamily 1 group D member 1 [Source:HGNC Symbol;Acc:HGNC:7962]
MAPK12	2.85303	4.92955e-05	mitogen-activated protein kinase 12 [Source:HGNC Symbol;Acc:HGNC:6874]
SIK1	2.84634	0	salt inducible kinase 1 [Source:HGNC Symbol;Acc:HGNC:11142]
CTSD	2.8457	6.79369e-10	cathepsin D [Source:HGNC Symbol;Acc:HGNC:2529]
SELENOO	2.84438	0.0351277	selenoprotein O [Source:HGNC Symbol;Acc:HGNC:30395]
ATAD3A	2.8433	0.00246608	ATPase family, AAA domain containing 3A [Source:HGNC Symbol;Acc:HGNC:25567]
PPARGC1A	2.83553	0	PPARG coactivator 1 alpha [Source:HGNC Symbol;Acc:HGNC:9237]
ABCA2	2.82972	8.28858e-06	ATP binding cassette subfamily A member 2 [Source:HGNC Symbol;Acc:HGNC:32]
CDK2AP2	2.82755	3.79592e-06	cyclin dependent kinase 2 associated protein 2 [Source:HGNC Symbol;Acc:HGNC:30833]
LRWD1	2.82425	0.000180745	leucine rich repeats and WD repeat domain containing 1 [Source:HGNC Symbol;Acc:HGNC:21769]
SERINC2	2.81951	0.000151922	serine incorporator 2 [Source:HGNC Symbol;Acc:HGNC:23231]
BLVRB	2.81133	0.00816767	biliverdin reductase B [Source:HGNC Symbol;Acc:HGNC:1063]
MT1X	2.80738	7.72399e-09	metallothionein 1X [Source:HGNC Symbol;Acc:HGNC:7405]
NUPR1	2.80232	0.000266149	nuclear protein 1, transcriptional regulator [Source:HGNC Symbol;Acc:HGNC:29990]
CARD19	2.79315	0.00079096	caspase recruitment domain family member 19 [Source:HGNC Symbol;Acc:HGNC:28148]
ZDHHC8	2.78965	0.0198738	zinc finger DHHC-type containing 8 [Source:HGNC Symbol;Acc:HGNC:18474]
SLC4A3	2.78857	0.000373335	solute carrier family 4 member 3 [Source:HGNC Symbol;Acc:HGNC:11029]
PSMB10	2.78667	0.0116738	proteasome subunit beta 10 [Source:HGNC Symbol;Acc:HGNC:9538]
GNB2	2.78665	6.70157e-05	G protein subunit beta 2 [Source:HGNC Symbol;Acc:HGNC:4398]
RBM42	2.7825	0.000129429	RNA binding motif protein 42 [Source:HGNC Symbol;Acc:HGNC:28117]
ATAD3B	2.77956	1.46661e-05	ATPase family, AAA domain containing 3B [Source:HGNC Symbol;Acc:HGNC:24007]
FLNC	2.77937	4.11036e-07	filamin C [Source:HGNC Symbol;Acc:HGNC:3756]
ARMC6	2.75994	0.00243031	armadillo repeat containing 6 [Source:HGNC Symbol;Acc:HGNC:25049]
ETFB	2.75406	0.0218859	electron transfer flavoprotein beta subunit [Source:HGNC Symbol;Acc:HGNC:3482]
HCN2	2.74569	0.00218921	hyperpolarization activated cyclic nucleotide gated potassium channel 2 [Source:HGNC Symbol;Acc:HGNC:4846]
FPGS	2.7433	1.37347e-05	folylpolyglutamate synthase [Source:HGNC Symbol;Acc:HGNC:3824]
NCLN	2.73277	9.90003e-05	nicalin [Source:HGNC Symbol;Acc:HGNC:26923]
SLC16A3	2.7276	1.02944e-05	solute carrier family 16 member 3 [Source:HGNC Symbol;Acc:HGNC:10924]
TRMT2A	2.71994	0.000132649	tRNA methyltransferase 2 homolog A [Source:HGNC Symbol;Acc:HGNC:24974]
TRAF2	2.71733	0.00442078	TNF receptor associated factor 2 [Source:HGNC Symbol;Acc:HGNC:12032]
SH3GL1	2.70374	4.84435e-06	SH3 domain containing GRB2 like 1, endophilin A2 [Source:HGNC Symbol;Acc:HGNC:10830]
COL7A1	2.70208	3.20136e-07	collagen type VII alpha 1 chain [Source:HGNC Symbol;Acc:HGNC:2214]
ENDOG	2.69943	0.0233908	endonuclease G [Source:HGNC Symbol;Acc:HGNC:3346]
RHOT2	2.68891	2.95804e-05	ras homolog family member T2 [Source:HGNC Symbol;Acc:HGNC:21169]
FAM129B	2.68464	1.82842e-07	family with sequence similarity 129 member B [Source:HGNC Symbol;Acc:HGNC:25282]
ARHGEF1	2.684	0.00124404	Rho guanine nucleotide exchange factor 1 [Source:HGNC Symbol;Acc:HGNC:681]
SLC25A22	2.68004	0.0106312	solute carrier family 25 member 22 [Source:HGNC Symbol;Acc:HGNC:19954]
PPAN	2.67938	0.00909694	peter pan homolog (Drosophila) [Source:HGNC Symbol;Acc:HGNC:9227]
GPAA1	2.67298	2.76885e-05	glycosylphosphatidylinositol anchor attachment 1 [Source:HGNC Symbol;Acc:HGNC:4446]
CLASRP	2.6708	4.86053e-06	CLK4 associating serine/arginine rich protein [Source:HGNC Symbol;Acc:HGNC:17731]
TWF2	2.66857	0.010461	twinfilin actin binding protein 2 [Source:HGNC Symbol;Acc:HGNC:9621]
ELOB	2.6657	0.00518857	elongin B [Source:HGNC Symbol;Acc:HGNC:11619]
PLK3	2.65848	0.00468018	polo like kinase 3 [Source:HGNC Symbol;Acc:HGNC:2154]
DDX49	2.65652	0.00276525	DEAD-box helicase 49 [Source:HGNC Symbol;Acc:HGNC:18684]
SLC39A13	2.6428	0.00679256	solute carrier family 39 member 13 [Source:HGNC Symbol;Acc:HGNC:20859]
ZMAT5	2.62715	0.0373515	zinc finger matrin-type 5 [Source:HGNC Symbol;Acc:HGNC:28046]
C19orf70	2.62351	0.0183404	chromosome 19 open reading frame 70 [Source:HGNC Symbol;Acc:HGNC:33702]
APRT	2.61564	5.83845e-05	adenine phosphoribosyltransferase [Source:HGNC Symbol;Acc:HGNC:626]
ALDOA	2.61196	1.03913e-07	aldolase, fructose-bisphosphate A [Source:HGNC Symbol;Acc:HGNC:414]
PHPT1	2.61034	0.00571957	phosphohistidine phosphatase 1 [Source:HGNC Symbol;Acc:HGNC:30033]
CIC	2.60871	0.000421615	capicua transcriptional repressor [Source:HGNC Symbol;Acc:HGNC:14214]
MON1A	2.60836	0.00200506	MON1 homolog A, secretory trafficking associated [Source:HGNC Symbol;Acc:HGNC:28207]
CD151	2.60781	1.09885e-05	CD151 molecule (Raph blood group) [Source:HGNC Symbol;Acc:HGNC:1630]
GADD45A	2.60717	0	growth arrest and DNA damage inducible alpha [Source:HGNC Symbol;Acc:HGNC:4095]
KLF4	2.60252	8.2569e-07	Kruppel like factor 4 [Source:HGNC Symbol;Acc:HGNC:6348]
NPDC1	2.58584	0.0136132	neural proliferation, differentiation and control 1 [Source:HGNC Symbol;Acc:HGNC:7899]
PITPNM1	2.58046	0.000765442	phosphatidylinositol transfer protein membrane associated 1 [Source:HGNC Symbol;Acc:HGNC:9003]
KATNB1	2.57686	0.0021288	katanin regulatory subunit B1 [Source:HGNC Symbol;Acc:HGNC:6217]
KRT81	2.57271	3.3149e-05	keratin 81 [Source:HGNC Symbol;Acc:HGNC:6458]
TMEM259	2.53558	1.00455e-05	transmembrane protein 259 [Source:HGNC Symbol;Acc:HGNC:17039]
SCYL1	2.53349	3.03658e-06	SCY1 like pseudokinase 1 [Source:HGNC Symbol;Acc:HGNC:14372]
HOMER3	2.52975	0.000640315	homer scaffolding protein 3 [Source:HGNC Symbol;Acc:HGNC:17514]
SCRN2	2.52908	0.00524205	secernin 2 [Source:HGNC Symbol;Acc:HGNC:30381]
PDLIM7	2.52643	0.0101446	PDZ and LIM domain 7 [Source:HGNC Symbol;Acc:HGNC:22958]
HGH1	2.52563	0.0372671	HGH1 homolog [Source:HGNC Symbol;Acc:HGNC:24161]
DEAF1	2.52513	0.000346486	DEAF1, transcription factor [Source:HGNC Symbol;Acc:HGNC:14677]
LY6E	2.5221	0.00267298	lymphocyte antigen 6 family member E [Source:HGNC Symbol;Acc:HGNC:6727]
INTS1	2.51742	0.00130223	integrator complex subunit 1 [Source:HGNC Symbol;Acc:HGNC:24555]
RNH1	2.51694	0.0012019	ribonuclease/angiogenin inhibitor 1 [Source:HGNC Symbol;Acc:HGNC:10074]
G6PD	2.51391	3.3596e-05	glucose-6-phosphate dehydrogenase [Source:HGNC Symbol;Acc:HGNC:4057]
KCTD17	2.50895	0.00486355	potassium channel tetramerization domain containing 17 [Source:HGNC Symbol;Acc:HGNC:25705]
KLF16	2.50881	3.82004e-05	Kruppel like factor 16 [Source:HGNC Symbol;Acc:HGNC:16857]
PPP1R15A	2.49789	0	protein phosphatase 1 regulatory subunit 15A [Source:HGNC Symbol;Acc:HGNC:14375]
ERF	2.49691	2.37656e-06	ETS2 repressor factor [Source:HGNC Symbol;Acc:HGNC:3444]
RPL8	2.48865	1.39321e-06	ribosomal protein L8 [Source:HGNC Symbol;Acc:HGNC:10368]
SLC25A6	2.48607	1.11025e-08	solute carrier family 25 member 6 [Source:HGNC Symbol;Acc:HGNC:10992]
RPL36	2.4797	2.04913e-06	ribosomal protein L36 [Source:HGNC Symbol;Acc:HGNC:13631]
TRAF7	2.47437	2.82201e-07	TNF receptor associated factor 7 [Source:HGNC Symbol;Acc:HGNC:20456]
SPRY2	2.47379	1.01048e-08	sprouty RTK signaling antagonist 2 [Source:HGNC Symbol;Acc:HGNC:11270]
GUK1	2.47215	0.0282092	guanylate kinase 1 [Source:HGNC Symbol;Acc:HGNC:4693]
MRPL4	2.46913	0.0220686	mitochondrial ribosomal protein L4 [Source:HGNC Symbol;Acc:HGNC:14276]
KLC2	2.46727	0.0376626	kinesin light chain 2 [Source:HGNC Symbol;Acc:HGNC:20716]
ADGRG1	2.46577	2.01793e-06	adhesion G protein-coupled receptor G1 [Source:HGNC Symbol;Acc:HGNC:4512]
TUBB3	2.46394	0.0026266	tubulin beta 3 class III [Source:HGNC Symbol;Acc:HGNC:20772]
GRN	2.46285	0.000122017	granulin precursor [Source:HGNC Symbol;Acc:HGNC:4601]
BAIAP2	2.46214	4.23351e-08	BAI1 associated protein 2 [Source:HGNC Symbol;Acc:HGNC:947]
JMJD8	2.45949	0.00113854	jumonji domain containing 8 [Source:HGNC Symbol;Acc:HGNC:14148]
AGTRAP	2.45857	0.0248011	angiotensin II receptor associated protein [Source:HGNC Symbol;Acc:HGNC:13539]
PPP1R14B	2.44585	9.45883e-07	protein phosphatase 1 regulatory inhibitor subunit 14B [Source:HGNC Symbol;Acc:HGNC:9057]
IKBKG	2.44284	0.0189362	inhibitor of nuclear factor kappa B kinase subunit gamma [Source:HGNC Symbol;Acc:HGNC:5961]
EIF4EBP1	2.42831	7.83783e-05	eukaryotic translation initiation factor 4E binding protein 1 [Source:HGNC Symbol;Acc:HGNC:3288]
SNX8	2.42736	0.000324893	sorting nexin 8 [Source:HGNC Symbol;Acc:HGNC:14972]
RHOB	2.42411	0	ras homolog family member B [Source:HGNC Symbol;Acc:HGNC:668]
UBE2S	2.42297	0.000154341	ubiquitin conjugating enzyme E2 S [Source:HGNC Symbol;Acc:HGNC:17895]
IGFBP6	2.42276	0.0349858	insulin like growth factor binding protein 6 [Source:HGNC Symbol;Acc:HGNC:5475]
SLC2A4RG	2.41994	0.000332105	SLC2A4 regulator [Source:HGNC Symbol;Acc:HGNC:15930]
THOC6	2.41334	0.00421077	THO complex 6 [Source:HGNC Symbol;Acc:HGNC:28369]
RPS15	2.4121	0.000220715	ribosomal protein S15 [Source:HGNC Symbol;Acc:HGNC:10388]
GSDMD	2.41037	0.0424237	gasdermin D [Source:HGNC Symbol;Acc:HGNC:25697]
ADRM1	2.40804	5.30452e-05	adhesion regulating molecule 1 [Source:HGNC Symbol;Acc:HGNC:15759]
SGSM3	2.40505	0.00114289	small G protein signaling modulator 3 [Source:HGNC Symbol;Acc:HGNC:25228]
BRSK2	2.40444	0.00516112	BR serine/threonine kinase 2 [Source:HGNC Symbol;Acc:HGNC:11405]
SBF1	2.40362	0.0214067	SET binding factor 1 [Source:HGNC Symbol;Acc:HGNC:10542]
HSPA5	2.40346	0	heat shock protein family A (Hsp70) member 5 [Source:HGNC Symbol;Acc:HGNC:5238]
RARA	2.39961	9.74184e-05	retinoic acid receptor alpha [Source:HGNC Symbol;Acc:HGNC:9864]
MOB2	2.39819	0.0180738	MOB kinase activator 2 [Source:HGNC Symbol;Acc:HGNC:24904]
PPP1R12C	2.39505	0.012029	protein phosphatase 1 regulatory subunit 12C [Source:HGNC Symbol;Acc:HGNC:14947]
ANKRD13D	2.39287	0.0440855	ankyrin repeat domain 13D [Source:HGNC Symbol;Acc:HGNC:27880]
PLEKHM2	2.3924	7.9084e-07	pleckstrin homology and RUN domain containing M2 [Source:HGNC Symbol;Acc:HGNC:29131]
PUF60	2.38901	2.7948e-05	poly(U) binding splicing factor 60 [Source:HGNC Symbol;Acc:HGNC:17042]
XAB2	2.38652	0.0306476	XPA binding protein 2 [Source:HGNC Symbol;Acc:HGNC:14089]
ADGRB2	2.38386	0.0342369	adhesion G protein-coupled receptor B2 [Source:HGNC Symbol;Acc:HGNC:944]
RPS28	2.38258	5.86717e-05	ribosomal protein S28 [Source:HGNC Symbol;Acc:HGNC:10418]
IDH3G	2.38136	0.000128982	isocitrate dehydrogenase 3 (NAD(+)) gamma [Source:HGNC Symbol;Acc:HGNC:5386]
SDF4	2.37627	0.00456748	stromal cell derived factor 4 [Source:HGNC Symbol;Acc:HGNC:24188]
SLC25A39	2.37333	0.000238762	solute carrier family 25 member 39 [Source:HGNC Symbol;Acc:HGNC:24279]
CEP72	2.36895	0.000167986	centrosomal protein 72 [Source:HGNC Symbol;Acc:HGNC:25547]
PFKL	2.36566	3.56993e-05	phosphofructokinase, liver type [Source:HGNC Symbol;Acc:HGNC:8876]
THOP1	2.36255	4.45682e-06	thimet oligopeptidase 1 [Source:HGNC Symbol;Acc:HGNC:11793]
C19orf47	2.358	0.00183572	chromosome 19 open reading frame 47 [Source:HGNC Symbol;Acc:HGNC:26723]
PCBP4	2.35607	0.00323602	poly(rC) binding protein 4 [Source:HGNC Symbol;Acc:HGNC:8652]
TONSL	2.35296	0.000556286	tonsoku like, DNA repair protein [Source:HGNC Symbol;Acc:HGNC:7801]
EPN1	2.3461	0.00436965	epsin 1 [Source:HGNC Symbol;Acc:HGNC:21604]
TMEM222	2.33639	0.00656172	transmembrane protein 222 [Source:HGNC Symbol;Acc:HGNC:25363]
KLF10	2.33102	0	Kruppel like factor 10 [Source:HGNC Symbol;Acc:HGNC:11810]
GRK6	2.32998	2.71571e-05	G protein-coupled receptor kinase 6 [Source:HGNC Symbol;Acc:HGNC:4545]
RUVBL2	2.32806	0.00140167	RuvB like AAA ATPase 2 [Source:HGNC Symbol;Acc:HGNC:10475]
MGAT5B	2.32553	7.80586e-06	mannosyl (alpha-1,6-)-glycoprotein beta-1,6-N-acetyl-glucosaminyltransferase, isozyme B [Source:HGNC Symbol;Acc:HGNC:24140]
C20orf27	2.32428	0.000389392	chromosome 20 open reading frame 27 [Source:HGNC Symbol;Acc:HGNC:15873]
LGALS1	2.3173	1.23923e-05	galectin 1 [Source:HGNC Symbol;Acc:HGNC:6561]
ACAP3	2.31587	0.0235185	ArfGAP with coiled-coil, ankyrin repeat and PH domains 3 [Source:HGNC Symbol;Acc:HGNC:16754]
FAM83G	2.31351	0.000765174	family with sequence similarity 83 member G [Source:HGNC Symbol;Acc:HGNC:32554]
DVL2	2.31163	2.87599e-08	dishevelled segment polarity protein 2 [Source:HGNC Symbol;Acc:HGNC:3086]
RRP9	2.31143	0.000310891	ribosomal RNA processing 9, small subunit (SSU) processome component, homolog (yeast) [Source:HGNC Symbol;Acc:HGNC:16829]
GPX4	2.31079	3.50787e-05	glutathione peroxidase 4 [Source:HGNC Symbol;Acc:HGNC:4556]
YIF1B	2.30886	0.00146393	Yip1 interacting factor homolog B, membrane trafficking protein [Source:HGNC Symbol;Acc:HGNC:30511]
CYC1	2.30851	9.55415e-06	cytochrome c1 [Source:HGNC Symbol;Acc:HGNC:2579]
PCNX3	2.30775	0.00809255	pecanex homolog 3 (Drosophila) [Source:HGNC Symbol;Acc:HGNC:18760]
CAMTA2	2.30144	0.00490495	calmodulin binding transcription activator 2 [Source:HGNC Symbol;Acc:HGNC:18807]
IMPDH1	2.30099	0.000262357	inosine monophosphate dehydrogenase 1 [Source:HGNC Symbol;Acc:HGNC:6052]
ARHGEF18	2.29659	7.85864e-09	Rho/Rac guanine nucleotide exchange factor 18 [Source:HGNC Symbol;Acc:HGNC:17090]
ZYX	2.29508	1.35642e-05	zyxin [Source:HGNC Symbol;Acc:HGNC:13200]
FARSA	2.29281	0.000163123	phenylalanyl-tRNA synthetase alpha subunit [Source:HGNC Symbol;Acc:HGNC:3592]
CCDC9	2.29211	0.000555338	coiled-coil domain containing 9 [Source:HGNC Symbol;Acc:HGNC:24560]
GTPBP6	2.29033	0.0481347	GTP binding protein 6 (putative) [Source:HGNC Symbol;Acc:HGNC:30189]
RPS19BP1	2.28949	0.00551603	ribosomal protein S19 binding protein 1 [Source:HGNC Symbol;Acc:HGNC:28749]
GPS1	2.28891	3.35282e-05	G protein pathway suppressor 1 [Source:HGNC Symbol;Acc:HGNC:4549]
UAP1L1	2.28421	1.83613e-11	UDP-N-acetylglucosamine pyrophosphorylase 1 like 1 [Source:HGNC Symbol;Acc:HGNC:28082]
VEGFA	2.28266	0	vascular endothelial growth factor A [Source:HGNC Symbol;Acc:HGNC:12680]
PPP4C	2.27847	0.000194826	protein phosphatase 4 catalytic subunit [Source:HGNC Symbol;Acc:HGNC:9319]
MVP	2.27775	2.42776e-06	major vault protein [Source:HGNC Symbol;Acc:HGNC:7531]
EEF1A2	2.27601	0.0062692	eukaryotic translation elongation factor 1 alpha 2 [Source:HGNC Symbol;Acc:HGNC:3192]
MCM5	2.27395	2.89675e-06	minichromosome maintenance complex component 5 [Source:HGNC Symbol;Acc:HGNC:6948]
FASTK	2.27378	0.00115618	Fas activated serine/threonine kinase [Source:HGNC Symbol;Acc:HGNC:24676]
PCIF1	2.27253	0.000491126	PDX1 C-terminal inhibiting factor 1 [Source:HGNC Symbol;Acc:HGNC:16200]
PRAG1	2.26935	6.54227e-06	PEAK1 related kinase activating pseudokinase 1 [Source:HGNC Symbol;Acc:HGNC:25438]
NDUFS8	2.26757	0.037237	NADH:ubiquinone oxidoreductase core subunit S8 [Source:HGNC Symbol;Acc:HGNC:7715]
PTOV1	2.26721	0.000537921	prostate tumor overexpressed 1 [Source:HGNC Symbol;Acc:HGNC:9632]
MRPS2	2.2624	0.000874638	mitochondrial ribosomal protein S2 [Source:HGNC Symbol;Acc:HGNC:14495]
ALMS1-IT1	2.26109	0.0443605	ALMS1 intronic transcript 1 [Source:HGNC Symbol;Acc:HGNC:41305]
PCED1A	2.25406	0.00576185	PC-esterase domain containing 1A [Source:HGNC Symbol;Acc:HGNC:16212]
SH3GLB2	2.2535	0.00129378	SH3 domain containing GRB2 like, endophilin B2 [Source:HGNC Symbol;Acc:HGNC:10834]
WASH6P	2.25266	0.00362851	WAS protein family homolog 6 pseudogene [Source:HGNC Symbol;Acc:HGNC:31685]
ADAM15	2.24645	0.000361453	ADAM metallopeptidase domain 15 [Source:HGNC Symbol;Acc:HGNC:193]
PTGES2	2.245	0.00248477	prostaglandin E synthase 2 [Source:HGNC Symbol;Acc:HGNC:17822]
PORCN	2.24233	0.00252723	porcupine homolog (Drosophila) [Source:HGNC Symbol;Acc:HGNC:17652]
OSBPL7	2.24157	0.00932916	oxysterol binding protein like 7 [Source:HGNC Symbol;Acc:HGNC:16387]
NCKIPSD	2.24126	0.0136337	NCK interacting protein with SH3 domain [Source:HGNC Symbol;Acc:HGNC:15486]
DLG4	2.24016	3.53056e-06	discs large MAGUK scaffold protein 4 [Source:HGNC Symbol;Acc:HGNC:2903]
LRRC45	2.23682	0.016558	leucine rich repeat containing 45 [Source:HGNC Symbol;Acc:HGNC:28302]
CU639417.2	2.23659	4.06886e-05
UBXN11	2.23441	0.0190794	UBX domain protein 11 [Source:HGNC Symbol;Acc:HGNC:30600]
PRMT1	2.22743	5.61614e-05	protein arginine methyltransferase 1 [Source:HGNC Symbol;Acc:HGNC:5187]
FP565260.3	2.2267	0.000525758
PI4KAP2	2.2255	0.0337643	phosphatidylinositol 4-kinase alpha pseudogene 2 [Source:HGNC Symbol;Acc:HGNC:33577]
AP5Z1	2.22508	0.00323589	adaptor related protein complex 5 zeta 1 subunit [Source:HGNC Symbol;Acc:HGNC:22197]
SCRIB	2.22491	0.0117388	scribbled planar cell polarity protein [Source:HGNC Symbol;Acc:HGNC:30377]
DUSP5	2.2232	0.000121768	dual specificity phosphatase 5 [Source:HGNC Symbol;Acc:HGNC:3071]
PMM1	2.22048	0.00438553	phosphomannomutase 1 [Source:HGNC Symbol;Acc:HGNC:9114]
SF3B5	2.21721	0.0108533	splicing factor 3b subunit 5 [Source:HGNC Symbol;Acc:HGNC:21083]
C16orf59	2.21449	0.046293	chromosome 16 open reading frame 59 [Source:HGNC Symbol;Acc:HGNC:25849]
DRD2	2.21211	0.00212035	dopamine receptor D2 [Source:HGNC Symbol;Acc:HGNC:3023]
GCAT	2.21138	0.0303728	glycine C-acetyltransferase [Source:HGNC Symbol;Acc:HGNC:4188]
PLXNB2	2.20986	1.88952e-05	plexin B2 [Source:HGNC Symbol;Acc:HGNC:9104]
NCAPH2	2.20112	4.71511e-05	non-SMC condensin II complex subunit H2 [Source:HGNC Symbol;Acc:HGNC:25071]
GAS6	2.19974	0.0109143	growth arrest specific 6 [Source:HGNC Symbol;Acc:HGNC:4168]
DGKZ	2.19706	2.08187e-05	diacylglycerol kinase zeta [Source:HGNC Symbol;Acc:HGNC:2857]
HMGA1	2.19698	2.46917e-07	high mobility group AT-hook 1 [Source:HGNC Symbol;Acc:HGNC:5010]
TXNIP	2.19655	0	thioredoxin interacting protein [Source:HGNC Symbol;Acc:HGNC:16952]
GEM	2.19388	0	GTP binding protein overexpressed in skeletal muscle [Source:HGNC Symbol;Acc:HGNC:4234]
RAB1B	2.19162	7.04431e-05	RAB1B, member RAS oncogene family [Source:HGNC Symbol;Acc:HGNC:18370]
CHMP1A	2.18819	0.000349304	charged multivesicular body protein 1A [Source:HGNC Symbol;Acc:HGNC:8740]
MTSS1L	2.18781	7.28699e-08	MTSS1L, I-BAR domain containing [Source:HGNC Symbol;Acc:HGNC:25094]
BIN1	2.18294	0.0115189	bridging integrator 1 [Source:HGNC Symbol;Acc:HGNC:1052]
SART1	2.17936	0.0143843	squamous cell carcinoma antigen recognized by T-cells 1 [Source:HGNC Symbol;Acc:HGNC:10538]
CDK10	2.17792	0.0254584	cyclin dependent kinase 10 [Source:HGNC Symbol;Acc:HGNC:1770]
EFEMP2	2.17754	2.83122e-05	EGF containing fibulin like extracellular matrix protein 2 [Source:HGNC Symbol;Acc:HGNC:3219]
CSK	2.17398	0.000108675	CSK, non-receptor tyrosine kinase [Source:HGNC Symbol;Acc:HGNC:2444]
PTGER4	2.17291	0.00542785	prostaglandin E receptor 4 [Source:HGNC Symbol;Acc:HGNC:9596]
PLD3	2.17095	0.00905744	phospholipase D family member 3 [Source:HGNC Symbol;Acc:HGNC:17158]
SLC4A2	2.16975	0.000543623	solute carrier family 4 member 2 [Source:HGNC Symbol;Acc:HGNC:11028]
NTMT1	2.16913	0.00342674	N-terminal Xaa-Pro-Lys N-methyltransferase 1 [Source:HGNC Symbol;Acc:HGNC:23373]
FIS1	2.16857	0.00177398	fission, mitochondrial 1 [Source:HGNC Symbol;Acc:HGNC:21689]
STK25	2.16546	3.72626e-06	serine/threonine kinase 25 [Source:HGNC Symbol;Acc:HGNC:11404]
ITPR3	2.1623	2.91333e-09	inositol 1,4,5-trisphosphate receptor type 3 [Source:HGNC Symbol;Acc:HGNC:6182]
OTUD1	2.15846	5.58959e-05	OTU deubiquitinase 1 [Source:HGNC Symbol;Acc:HGNC:27346]
GIPC1	2.15016	0.0020382	GIPC PDZ domain containing family member 1 [Source:HGNC Symbol;Acc:HGNC:1226]
SORBS3	2.14994	0.00138212	sorbin and SH3 domain containing 3 [Source:HGNC Symbol;Acc:HGNC:30907]
MFSD12	2.1496	6.56932e-05	major facilitator superfamily domain containing 12 [Source:HGNC Symbol;Acc:HGNC:28299]
DRAP1	2.1437	4.57462e-05	DR1 associated protein 1 [Source:HGNC Symbol;Acc:HGNC:3019]
EEF1D	2.14134	1.62528e-07	eukaryotic translation elongation factor 1 delta [Source:HGNC Symbol;Acc:HGNC:3211]
SPOCD1	2.1404	0.00150725	SPOC domain containing 1 [Source:HGNC Symbol;Acc:HGNC:26338]
ZFAND2B	2.14006	0.00624448	zinc finger AN1-type containing 2B [Source:HGNC Symbol;Acc:HGNC:25206]
LLGL1	2.13651	0.00159477	LLGL1, scribble cell polarity complex component [Source:HGNC Symbol;Acc:HGNC:6628]
LONP1	2.13647	6.09839e-06	lon peptidase 1, mitochondrial [Source:HGNC Symbol;Acc:HGNC:9479]
DXO	2.13594	0.00461311	decapping exoribonuclease [Source:HGNC Symbol;Acc:HGNC:2992]
TMEM201	2.13383	0.000510791	transmembrane protein 201 [Source:HGNC Symbol;Acc:HGNC:33719]
CLCN7	2.13338	0.000148618	chloride voltage-gated channel 7 [Source:HGNC Symbol;Acc:HGNC:2025]
AXIN1	2.13254	0.000309888	axin 1 [Source:HGNC Symbol;Acc:HGNC:903]
STMN3	2.12842	9.93152e-06	stathmin 3 [Source:HGNC Symbol;Acc:HGNC:15926]
FAM46C	2.12117	0.000146329	family with sequence similarity 46 member C [Source:HGNC Symbol;Acc:HGNC:24712]
GFER	2.11999	0.000592103	growth factor, augmenter of liver regeneration [Source:HGNC Symbol;Acc:HGNC:4236]
PTPN23	2.11865	1.22527e-05	protein tyrosine phosphatase, non-receptor type 23 [Source:HGNC Symbol;Acc:HGNC:14406]
TPRA1	2.11704	0.00189522	transmembrane protein adipocyte associated 1 [Source:HGNC Symbol;Acc:HGNC:30413]
ARFGAP1	2.11419	0.00115171	ADP ribosylation factor GTPase activating protein 1 [Source:HGNC Symbol;Acc:HGNC:15852]
SPNS1	2.11289	0.0478087	sphingolipid transporter 1 (putative) [Source:HGNC Symbol;Acc:HGNC:30621]
CUEDC2	2.11122	0.0426171	CUE domain containing 2 [Source:HGNC Symbol;Acc:HGNC:28352]
KLF11	2.11086	1.46278e-09	Kruppel like factor 11 [Source:HGNC Symbol;Acc:HGNC:11811]
SEPT5	2.10962	0.000264022	septin 5 [Source:HGNC Symbol;Acc:HGNC:9164]
CHID1	2.10921	8.63569e-05	chitinase domain containing 1 [Source:HGNC Symbol;Acc:HGNC:28474]
COMT	2.10848	0.0405568	catechol-O-methyltransferase [Source:HGNC Symbol;Acc:HGNC:2228]
GIT1	2.10833	3.2633e-05	GIT ArfGAP 1 [Source:HGNC Symbol;Acc:HGNC:4272]
MAPK7	2.1078	0.00148774	mitogen-activated protein kinase 7 [Source:HGNC Symbol;Acc:HGNC:6880]
TMEM132A	2.10631	0.0438538	transmembrane protein 132A [Source:HGNC Symbol;Acc:HGNC:31092]
UNC45A	2.10592	2.66914e-05	unc-45 myosin chaperone A [Source:HGNC Symbol;Acc:HGNC:30594]
MAD1L1	2.10524	0.00379504	MAD1 mitotic arrest deficient like 1 [Source:HGNC Symbol;Acc:HGNC:6762]
CENPB	2.10421	3.55697e-05	centromere protein B [Source:HGNC Symbol;Acc:HGNC:1852]
EPHA2	2.09959	1.5848e-06	EPH receptor A2 [Source:HGNC Symbol;Acc:HGNC:3386]
PKMYT1	2.0988	0.00949768	protein kinase, membrane associated tyrosine/threonine 1 [Source:HGNC Symbol;Acc:HGNC:29650]
GRK2	2.09605	0.00256485	G protein-coupled receptor kinase 2 [Source:HGNC Symbol;Acc:HGNC:289]
G0S2	2.09437	0.00238938	G0/G1 switch 2 [Source:HGNC Symbol;Acc:HGNC:30229]
MRC2	2.09226	0.00446509	mannose receptor C type 2 [Source:HGNC Symbol;Acc:HGNC:16875]
SERF2	2.09193	6.39219e-05	small EDRK-rich factor 2 [Source:HGNC Symbol;Acc:HGNC:10757]
BCAR3	2.08748	0	breast cancer anti-estrogen resistance 3 [Source:HGNC Symbol;Acc:HGNC:973]
RAI1	2.08632	0.00203043	retinoic acid induced 1 [Source:HGNC Symbol;Acc:HGNC:9834]
PIEZO1	2.07872	0.000192405	piezo type mechanosensitive ion channel component 1 [Source:HGNC Symbol;Acc:HGNC:28993]
ARL4C	2.07683	0	ADP ribosylation factor like GTPase 4C [Source:HGNC Symbol;Acc:HGNC:698]
AGAP3	2.0751	0.00455424	ArfGAP with GTPase domain, ankyrin repeat and PH domain 3 [Source:HGNC Symbol;Acc:HGNC:16923]
RPS5	2.07487	3.01231e-05	ribosomal protein S5 [Source:HGNC Symbol;Acc:HGNC:10426]
LMAN2	2.07321	0.00113197	lectin, mannose binding 2 [Source:HGNC Symbol;Acc:HGNC:16986]
BAX	2.0716	0.000179436	BCL2 associated X, apoptosis regulator [Source:HGNC Symbol;Acc:HGNC:959]
PRDX2	2.0679	8.23748e-05	peroxiredoxin 2 [Source:HGNC Symbol;Acc:HGNC:9353]
EEF2	2.06774	2.44817e-11	eukaryotic translation elongation factor 2 [Source:HGNC Symbol;Acc:HGNC:3214]
MAP2K2	2.06429	0.00458094	mitogen-activated protein kinase kinase 2 [Source:HGNC Symbol;Acc:HGNC:6842]
CLN3	2.06154	0.0307279	CLN3, battenin [Source:HGNC Symbol;Acc:HGNC:2074]
AKT2	2.06053	0.000953552	AKT serine/threonine kinase 2 [Source:HGNC Symbol;Acc:HGNC:392]
LTBR	2.05388	1.85223e-06	lymphotoxin beta receptor [Source:HGNC Symbol;Acc:HGNC:6718]
INF2	2.05224	0.00219421	inverted formin, FH2 and WH2 domain containing [Source:HGNC Symbol;Acc:HGNC:23791]
RPS6KB2	2.04949	0.00465783	ribosomal protein S6 kinase B2 [Source:HGNC Symbol;Acc:HGNC:10437]
SETD1A	2.04808	6.86137e-05	SET domain containing 1A [Source:HGNC Symbol;Acc:HGNC:29010]
KIF7	2.04806	0.00101378	kinesin family member 7 [Source:HGNC Symbol;Acc:HGNC:30497]
MYBBP1A	2.04546	2.95929e-06	MYB binding protein 1a [Source:HGNC Symbol;Acc:HGNC:7546]
MRPL38	2.04495	0.0184955	mitochondrial ribosomal protein L38 [Source:HGNC Symbol;Acc:HGNC:14033]
KMT2B	2.04194	0.0132858	lysine methyltransferase 2B [Source:HGNC Symbol;Acc:HGNC:15840]
TSC22D3	2.04098	3.79809e-06	TSC22 domain family member 3 [Source:HGNC Symbol;Acc:HGNC:3051]
TOMM40	2.04047	0.000360279	translocase of outer mitochondrial membrane 40 [Source:HGNC Symbol;Acc:HGNC:18001]
CUL7	2.04033	0.0020557	cullin 7 [Source:HGNC Symbol;Acc:HGNC:21024]
CD68	2.03683	1.40043e-05	CD68 molecule [Source:HGNC Symbol;Acc:HGNC:1693]
CENPM	2.03524	0.0313949	centromere protein M [Source:HGNC Symbol;Acc:HGNC:18352]
POLR2E	2.03518	0.00214354	RNA polymerase II subunit E [Source:HGNC Symbol;Acc:HGNC:9192]
PLPP2	2.03274	0.0452438	phospholipid phosphatase 2 [Source:HGNC Symbol;Acc:HGNC:9230]
BSG	2.03242	2.8837e-05	basigin (Ok blood group) [Source:HGNC Symbol;Acc:HGNC:1116]
MAD2L2	2.03217	0.000977796	mitotic arrest deficient 2 like 2 [Source:HGNC Symbol;Acc:HGNC:6764]
ITGA3	2.03206	1.39365e-06	integrin subunit alpha 3 [Source:HGNC Symbol;Acc:HGNC:6139]
HMOX1	2.03133	2.19658e-05	heme oxygenase 1 [Source:HGNC Symbol;Acc:HGNC:5013]
ATF3	2.03021	0.00121366	activating transcription factor 3 [Source:HGNC Symbol;Acc:HGNC:785]
TSTA3	2.02957	0.00261046	tissue specific transplantation antigen P35B [Source:HGNC Symbol;Acc:HGNC:12390]
SLC25A29	2.02951	0.000852949	solute carrier family 25 member 29 [Source:HGNC Symbol;Acc:HGNC:20116]
MYBL2	2.02932	3.85579e-05	MYB proto-oncogene like 2 [Source:HGNC Symbol;Acc:HGNC:7548]
CAPN1	2.02583	0.0125114	calpain 1 [Source:HGNC Symbol;Acc:HGNC:1476]
GSTP1	2.0254	0.00100287	glutathione S-transferase pi 1 [Source:HGNC Symbol;Acc:HGNC:4638]
ATF4	2.02335	0	activating transcription factor 4 [Source:HGNC Symbol;Acc:HGNC:786]
CRELD2	2.02239	1.47141e-05	cysteine rich with EGF like domains 2 [Source:HGNC Symbol;Acc:HGNC:28150]
EDF1	2.02162	0.001306	endothelial differentiation related factor 1 [Source:HGNC Symbol;Acc:HGNC:3164]
TRIM28	2.01981	5.62419e-05	tripartite motif containing 28 [Source:HGNC Symbol;Acc:HGNC:16384]
CDR2L	2.01974	9.76027e-05	cerebellar degeneration related protein 2 like [Source:HGNC Symbol;Acc:HGNC:29999]
ZMIZ2	2.01845	0.0030542	zinc finger MIZ-type containing 2 [Source:HGNC Symbol;Acc:HGNC:22229]
TUFM	2.01417	4.16471e-05	Tu translation elongation factor, mitochondrial [Source:HGNC Symbol;Acc:HGNC:12420]
SGSH	2.01371	0.0142007	N-sulfoglucosamine sulfohydrolase [Source:HGNC Symbol;Acc:HGNC:10818]
ZNF316	2.01077	0.0047178	zinc finger protein 316 [Source:HGNC Symbol;Acc:HGNC:13843]
TK1	2.01064	0.000974548	thymidine kinase 1 [Source:HGNC Symbol;Acc:HGNC:11830]
SMTN	2.00765	0.000407433	smoothelin [Source:HGNC Symbol;Acc:HGNC:11126]

## Sheet: 2DG-DOWN
Gene_Name	Fold change	Bonferroni p-value	Description
AC008878.3	-12.3091	0
PPP1R10	-4.57366	0	protein phosphatase 1 regulatory subunit 10 [Source:HGNC Symbol;Acc:HGNC:9284]
ZNF594	-3.01096	1.48053e-07	zinc finger protein 594 [Source:HGNC Symbol;Acc:HGNC:29392]
KDM4D	-2.90265	0.00453034	lysine demethylase 4D [Source:HGNC Symbol;Acc:HGNC:25498]
ZBED8	-2.8502	8.86851e-09	zinc finger BED-type containing 8 [Source:HGNC Symbol;Acc:HGNC:30804]
PI15	-2.79077	0	peptidase inhibitor 15 [Source:HGNC Symbol;Acc:HGNC:8946]
PCF11	-2.63784	0	PCF11 cleavage and polyadenylation factor subunit [Source:HGNC Symbol;Acc:HGNC:30097]
RBM26-AS1	-2.54169	0.00663447	RBM26 antisense RNA 1 [Source:HGNC Symbol;Acc:HGNC:39805]
IFIT2	-2.48627	0.00105938	interferon induced protein with tetratricopeptide repeats 2 [Source:HGNC Symbol;Acc:HGNC:5409]
PSMD6-AS2	-2.43676	0.0288351	PSMD6 antisense RNA 2 [Source:HGNC Symbol;Acc:HGNC:44125]
SLC2A12	-2.39176	0.00019162	solute carrier family 2 member 12 [Source:HGNC Symbol;Acc:HGNC:18067]
LINC00909	-2.33128	5.63466e-05	long intergenic non-protein coding RNA 909 [Source:HGNC Symbol;Acc:HGNC:44331]
TMPO-AS1	-2.22397	4.4726e-05	TMPO antisense RNA 1 [Source:HGNC Symbol;Acc:HGNC:44158]
AP003119.3	-2.1819	0.0116777
HARBI1	-2.17763	0.0175878	harbinger transposase derived 1 [Source:HGNC Symbol;Acc:HGNC:26522]
TIGD1	-2.10656	0.0292859	tigger transposable element derived 1 [Source:HGNC Symbol;Acc:HGNC:14523]
TTC30A	-2.06232	1.18555e-06	tetratricopeptide repeat domain 30A [Source:HGNC Symbol;Acc:HGNC:25853]
ZNF681	-2.04335	0.00819527	zinc finger protein 681 [Source:HGNC Symbol;Acc:HGNC:26457]
STON1	-2.03695	3.26454e-05	stonin 1 [Source:HGNC Symbol;Acc:HGNC:17003]
PEX12	-2.03443	0.00458469	peroxisomal biogenesis factor 12 [Source:HGNC Symbol;Acc:HGNC:8854]
BBS10	-2.01083	0.000774435	Bardet-Biedl syndrome 10 [Source:HGNC Symbol;Acc:HGNC:26291]

## Sheet: Phen-UP
Gene_Name	Fold change	Bonferroni p-value	Description
POC1B-GALNT4	11.3095	4.21257e-07	POC1B-GALNT4 readthrough [Source:HGNC Symbol;Acc:HGNC:42957]

## Sheet: Phen-DOWN
Gene_Name	Fold change	Bonferroni p-value	Description
TXNIP	-2.53709	0	thioredoxin interacting protein [Source:HGNC Symbol;Acc:HGNC:16952]

## Sheet: GH-UP
Gene_Name	Fold change	Bonferroni p-value	Description
HERPUD1	3.68101	0	homocysteine inducible ER protein with ubiquitin like domain 1 [Source:HGNC Symbol;Acc:HGNC:13744]
DNAJB9	2.52488	0	DnaJ heat shock protein family (Hsp40) member B9 [Source:HGNC Symbol;Acc:HGNC:6968]
DDIT3	2.46767	0	DNA damage inducible transcript 3 [Source:HGNC Symbol;Acc:HGNC:2726]
ANKRD1	2.27464	0.0149669	ankyrin repeat domain 1 [Source:HGNC Symbol;Acc:HGNC:15819]
PPP1R10	2.03483	0	protein phosphatase 1 regulatory subunit 10 [Source:HGNC Symbol;Acc:HGNC:9284]
HSPA5	2.03262	0	heat shock protein family A (Hsp70) member 5 [Source:HGNC Symbol;Acc:HGNC:5238]

## Sheet: GH-DOWN
Gene_Name	Fold change	Bonferroni p-value	Description
TXNIP	-87.892	0	thioredoxin interacting protein [Source:HGNC Symbol;Acc:HGNC:16952]
ARRDC4	-5.77259	0	arrestin domain containing 4 [Source:HGNC Symbol;Acc:HGNC:28087]
RGS2	-2.41852	1.23449e-08	regulator of G protein signaling 2 [Source:HGNC Symbol;Acc:HGNC:9998]
NEAT1	-2.13819	0	nuclear paraspeckle assembly transcript 1 (non-protein coding) [Source:HGNC Symbol;Acc:HGNC:30815]

## Sheet: 2DG+Phen-UP
Gene_Name	Fold change	Bonferroni p-value	Description
GDF15	16.5239	0	growth differentiation factor 15 [Source:HGNC Symbol;Acc:HGNC:30142]
SPRY2	7.10931	0	sprouty RTK signaling antagonist 2 [Source:HGNC Symbol;Acc:HGNC:11270]
AC067931.1	6.37172	0.0298318
MT1X	6.11156	0	metallothionein 1X [Source:HGNC Symbol;Acc:HGNC:7405]
ZNF358	5.77838	2.16645e-06	zinc finger protein 358 [Source:HGNC Symbol;Acc:HGNC:16838]
AC012181.2	5.68526	0.012363
SLC16A6	5.58632	0	solute carrier family 16 member 6 [Source:HGNC Symbol;Acc:HGNC:10927]
CXCL8	5.21193	1.4077e-10	C-X-C motif chemokine ligand 8 [Source:HGNC Symbol;Acc:HGNC:6025]
KLF6	5.04842	0	Kruppel like factor 6 [Source:HGNC Symbol;Acc:HGNC:2235]
RND3	5.01568	0	Rho family GTPase 3 [Source:HGNC Symbol;Acc:HGNC:671]
EGR1	4.70272	0	early growth response 1 [Source:HGNC Symbol;Acc:HGNC:3238]
STX1A	4.24754	1.45624e-07	syntaxin 1A [Source:HGNC Symbol;Acc:HGNC:11433]
NR1D1	4.17725	0	nuclear receptor subfamily 1 group D member 1 [Source:HGNC Symbol;Acc:HGNC:7962]
ATP5D	4.09738	0.0094438	ATP synthase, H+ transporting, mitochondrial F1 complex, delta subunit [Source:HGNC Symbol;Acc:HGNC:837]
PPP1R15A	3.7305	0	protein phosphatase 1 regulatory subunit 15A [Source:HGNC Symbol;Acc:HGNC:14375]
BHLHE40	3.69657	0	basic helix-loop-helix family member e40 [Source:HGNC Symbol;Acc:HGNC:1046]
FBXW5	3.69482	0.0496302	F-box and WD repeat domain containing 5 [Source:HGNC Symbol;Acc:HGNC:13613]
PLEKHF1	3.68389	0.000485896	pleckstrin homology and FYVE domain containing 1 [Source:HGNC Symbol;Acc:HGNC:20764]
ZFP36L1	3.67905	0	ZFP36 ring finger protein like 1 [Source:HGNC Symbol;Acc:HGNC:1107]
IRX1	3.6787	0.0047792	iroquois homeobox 1 [Source:HGNC Symbol;Acc:HGNC:14358]
IER3	3.60762	0	immediate early response 3 [Source:HGNC Symbol;Acc:HGNC:5392]
DUSP1	3.58291	0	dual specificity phosphatase 1 [Source:HGNC Symbol;Acc:HGNC:3064]
SIK1	3.57077	0	salt inducible kinase 1 [Source:HGNC Symbol;Acc:HGNC:11142]
BOP1	3.54153	0.00014275	block of proliferation 1 [Source:HGNC Symbol;Acc:HGNC:15519]
ADM	3.53728	0	adrenomedullin [Source:HGNC Symbol;Acc:HGNC:259]
OSGIN1	3.47662	0.0398073	oxidative stress induced growth inhibitor 1 [Source:HGNC Symbol;Acc:HGNC:30093]
GPSM1	3.46458	0.00133065	G protein signaling modulator 1 [Source:HGNC Symbol;Acc:HGNC:17858]
POLRMT	3.39969	0.000252701	RNA polymerase mitochondrial [Source:HGNC Symbol;Acc:HGNC:9200]
SNAI2	3.37371	0	snail family transcriptional repressor 2 [Source:HGNC Symbol;Acc:HGNC:11094]
LIF	3.34284	0	LIF, interleukin 6 family cytokine [Source:HGNC Symbol;Acc:HGNC:6596]
PLK3	3.31053	2.18211e-05	polo like kinase 3 [Source:HGNC Symbol;Acc:HGNC:2154]
PLEC	3.26986	3.04749e-07	plectin [Source:HGNC Symbol;Acc:HGNC:9069]
DUSP5	3.25882	0	dual specificity phosphatase 5 [Source:HGNC Symbol;Acc:HGNC:3071]
CDC42EP1	3.2566	0.00114737	CDC42 effector protein 1 [Source:HGNC Symbol;Acc:HGNC:17014]
NDUFA11	3.23195	0.024859	NADH:ubiquinone oxidoreductase subunit A11 [Source:HGNC Symbol;Acc:HGNC:20371]
ZNF460	3.16683	1.04959e-05	zinc finger protein 460 [Source:HGNC Symbol;Acc:HGNC:21628]
PTGER4	3.15453	5.44719e-10	prostaglandin E receptor 4 [Source:HGNC Symbol;Acc:HGNC:9596]
BCAR1	3.15326	0.000309543	BCAR1, Cas family scaffolding protein [Source:HGNC Symbol;Acc:HGNC:971]
AC026356.1	3.13492	4.37955e-05
DUSP10	3.1308	0	dual specificity phosphatase 10 [Source:HGNC Symbol;Acc:HGNC:3065]
RIN1	3.11448	0.000599626	Ras and Rab interactor 1 [Source:HGNC Symbol;Acc:HGNC:18749]
GADD45A	3.10718	0	growth arrest and DNA damage inducible alpha [Source:HGNC Symbol;Acc:HGNC:4095]
ZBTB17	3.10287	0.00117643	zinc finger and BTB domain containing 17 [Source:HGNC Symbol;Acc:HGNC:12936]
MYC	3.05721	0	MYC proto-oncogene, bHLH transcription factor [Source:HGNC Symbol;Acc:HGNC:7553]
JUN	3.04527	0	Jun proto-oncogene, AP-1 transcription factor subunit [Source:HGNC Symbol;Acc:HGNC:6204]
C19orf48	3.03782	6.14492e-08	chromosome 19 open reading frame 48 [Source:HGNC Symbol;Acc:HGNC:29667]
ATAD3B	3.02927	3.18783e-05	ATPase family, AAA domain containing 3B [Source:HGNC Symbol;Acc:HGNC:24007]
COL6A2	3.01597	0.000607279	collagen type VI alpha 2 chain [Source:HGNC Symbol;Acc:HGNC:2212]
CPSF1	2.95488	0.00669907	cleavage and polyadenylation specific factor 1 [Source:HGNC Symbol;Acc:HGNC:2324]
KIFC3	2.94211	1.21426e-06	kinesin family member C3 [Source:HGNC Symbol;Acc:HGNC:6326]
MT2A	2.94106	0	metallothionein 2A [Source:HGNC Symbol;Acc:HGNC:7406]
CLUH	2.91954	0.000111775	clustered mitochondria homolog [Source:HGNC Symbol;Acc:HGNC:29094]
TRAF2	2.89184	0.00840267	TNF receptor associated factor 2 [Source:HGNC Symbol;Acc:HGNC:12032]
ATAD3A	2.85541	0.0107401	ATPase family, AAA domain containing 3A [Source:HGNC Symbol;Acc:HGNC:25567]
SLC2A3	2.83904	0	solute carrier family 2 member 3 [Source:HGNC Symbol;Acc:HGNC:11007]
FASN	2.81641	0.00265103	fatty acid synthase [Source:HGNC Symbol;Acc:HGNC:3594]
FLNC	2.81517	1.12047e-07	filamin C [Source:HGNC Symbol;Acc:HGNC:3756]
MVD	2.80463	0.045732	mevalonate diphosphate decarboxylase [Source:HGNC Symbol;Acc:HGNC:7529]
FAM46C	2.76829	6.12044e-12	family with sequence similarity 46 member C [Source:HGNC Symbol;Acc:HGNC:24712]
SBNO2	2.7653	0.003388	strawberry notch homolog 2 [Source:HGNC Symbol;Acc:HGNC:29158]
SLC4A3	2.75932	0.0498162	solute carrier family 4 member 3 [Source:HGNC Symbol;Acc:HGNC:11029]
CCL2	2.73349	1.86165e-07	C-C motif chemokine ligand 2 [Source:HGNC Symbol;Acc:HGNC:10618]
ADRB2	2.72596	0	adrenoceptor beta 2 [Source:HGNC Symbol;Acc:HGNC:286]
CTSD	2.71254	1.01991e-07	cathepsin D [Source:HGNC Symbol;Acc:HGNC:2529]
DDIT3	2.71095	0	DNA damage inducible transcript 3 [Source:HGNC Symbol;Acc:HGNC:2726]
TGIF1	2.69689	0	TGFB induced factor homeobox 1 [Source:HGNC Symbol;Acc:HGNC:11776]
RPS9	2.69184	1.95969e-05	ribosomal protein S9 [Source:HGNC Symbol;Acc:HGNC:10442]
SMOX	2.6756	0.00153181	spermine oxidase [Source:HGNC Symbol;Acc:HGNC:15862]
ARL4C	2.67033	0	ADP ribosylation factor like GTPase 4C [Source:HGNC Symbol;Acc:HGNC:698]
FLNA	2.66577	9.21242e-06	filamin A [Source:HGNC Symbol;Acc:HGNC:3754]
MLST8	2.65279	0.0308419	MTOR associated protein, LST8 homolog [Source:HGNC Symbol;Acc:HGNC:24825]
C10orf10	2.64777	0.000757407	chromosome 10 open reading frame 10 [Source:HGNC Symbol;Acc:HGNC:23355]
SERINC2	2.63973	0.0139586	serine incorporator 2 [Source:HGNC Symbol;Acc:HGNC:23231]
CU639417.2	2.63379	1.13351e-08
GNB2	2.63364	0.00618277	G protein subunit beta 2 [Source:HGNC Symbol;Acc:HGNC:4398]
PKD1P6	2.62854	3.7086e-05	polycystin 1, transient receptor potential channel interacting pseudogene 6 [Source:HGNC Symbol;Acc:HGNC:30070]
CTGF	2.58767	0	connective tissue growth factor [Source:HGNC Symbol;Acc:HGNC:2500]
KLF11	2.58177	0	Kruppel like factor 11 [Source:HGNC Symbol;Acc:HGNC:11811]
RBM42	2.57549	0.00495235	RNA binding motif protein 42 [Source:HGNC Symbol;Acc:HGNC:28117]
PKN1	2.56612	0.0177059	protein kinase N1 [Source:HGNC Symbol;Acc:HGNC:9405]
DDX49	2.56524	0.00728444	DEAD-box helicase 49 [Source:HGNC Symbol;Acc:HGNC:18684]
G0S2	2.52382	6.40877e-06	G0/G1 switch 2 [Source:HGNC Symbol;Acc:HGNC:30229]
NTF3	2.51586	0.00152144	neurotrophin 3 [Source:HGNC Symbol;Acc:HGNC:8023]
CLASRP	2.49862	0.000841295	CLK4 associating serine/arginine rich protein [Source:HGNC Symbol;Acc:HGNC:17731]
SGK1	2.49545	0	serum/glucocorticoid regulated kinase 1 [Source:HGNC Symbol;Acc:HGNC:10810]
NCLN	2.49531	0.00714117	nicalin [Source:HGNC Symbol;Acc:HGNC:26923]
FPGS	2.48509	0.00288547	folylpolyglutamate synthase [Source:HGNC Symbol;Acc:HGNC:3824]
ARRDC4	2.4784	0	arrestin domain containing 4 [Source:HGNC Symbol;Acc:HGNC:28087]
FAM3A	2.4704	0.0232662	family with sequence similarity 3 member A [Source:HGNC Symbol;Acc:HGNC:13749]
ARL4D	2.46396	0	ADP ribosylation factor like GTPase 4D [Source:HGNC Symbol;Acc:HGNC:656]
ALDOA	2.45437	1.13389e-05	aldolase, fructose-bisphosphate A [Source:HGNC Symbol;Acc:HGNC:414]
PIM1	2.4444	0	Pim-1 proto-oncogene, serine/threonine kinase [Source:HGNC Symbol;Acc:HGNC:8986]
EPHA2	2.43422	3.06022e-11	EPH receptor A2 [Source:HGNC Symbol;Acc:HGNC:3386]
RPL36	2.43341	1.79355e-06	ribosomal protein L36 [Source:HGNC Symbol;Acc:HGNC:13631]
SH3GL1	2.41282	0.00457164	SH3 domain containing GRB2 like 1, endophilin A2 [Source:HGNC Symbol;Acc:HGNC:10830]
SF3A2	2.3961	0.00798738	splicing factor 3a subunit 2 [Source:HGNC Symbol;Acc:HGNC:10766]
RPS28	2.39455	8.79522e-05	ribosomal protein S28 [Source:HGNC Symbol;Acc:HGNC:10418]
APRT	2.39443	0.00581465	adenine phosphoribosyltransferase [Source:HGNC Symbol;Acc:HGNC:626]
RPS15	2.39318	0.000410461	ribosomal protein S15 [Source:HGNC Symbol;Acc:HGNC:10388]
FAM129B	2.39136	0.000217064	family with sequence similarity 129 member B [Source:HGNC Symbol;Acc:HGNC:25282]
RNH1	2.39027	0.0297462	ribonuclease/angiogenin inhibitor 1 [Source:HGNC Symbol;Acc:HGNC:10074]
SLC16A3	2.38435	0.00513277	solute carrier family 16 member 3 [Source:HGNC Symbol;Acc:HGNC:10924]
SLC25A6	2.37911	1.32097e-07	solute carrier family 25 member 6 [Source:HGNC Symbol;Acc:HGNC:10992]
PHLDA1	2.37896	0	pleckstrin homology like domain family A member 1 [Source:HGNC Symbol;Acc:HGNC:8933]
TMEM259	2.37526	0.000667887	transmembrane protein 259 [Source:HGNC Symbol;Acc:HGNC:17039]
KLF10	2.37257	0	Kruppel like factor 10 [Source:HGNC Symbol;Acc:HGNC:11810]
BDNF	2.3665	0	brain derived neurotrophic factor [Source:HGNC Symbol;Acc:HGNC:1033]
IRS2	2.36085	0	insulin receptor substrate 2 [Source:HGNC Symbol;Acc:HGNC:6126]
MED15	2.35002	3.06022e-11	mediator complex subunit 15 [Source:HGNC Symbol;Acc:HGNC:14248]
SAT1	2.34473	0	spermidine/spermine N1-acetyltransferase 1 [Source:HGNC Symbol;Acc:HGNC:10540]
C19orf47	2.34069	0.013693	chromosome 19 open reading frame 47 [Source:HGNC Symbol;Acc:HGNC:26723]
ITPRIP	2.33587	0	inositol 1,4,5-trisphosphate receptor interacting protein [Source:HGNC Symbol;Acc:HGNC:29370]
BRSK2	2.33126	0.00867484	BR serine/threonine kinase 2 [Source:HGNC Symbol;Acc:HGNC:11405]
NGF	2.32923	0.00352506	nerve growth factor [Source:HGNC Symbol;Acc:HGNC:7808]
SCYL1	2.31972	0.00124537	SCY1 like pseudokinase 1 [Source:HGNC Symbol;Acc:HGNC:14372]
KRT81	2.31437	0.0173725	keratin 81 [Source:HGNC Symbol;Acc:HGNC:6458]
ZYX	2.30949	5.81013e-05	zyxin [Source:HGNC Symbol;Acc:HGNC:13200]
SOX9	2.30842	0	SRY-box 9 [Source:HGNC Symbol;Acc:HGNC:11204]
NTMT1	2.30202	0.00128024	N-terminal Xaa-Pro-Lys N-methyltransferase 1 [Source:HGNC Symbol;Acc:HGNC:23373]
SMAD7	2.30116	1.25102e-08	SMAD family member 7 [Source:HGNC Symbol;Acc:HGNC:6773]
CD151	2.29756	0.00370372	CD151 molecule (Raph blood group) [Source:HGNC Symbol;Acc:HGNC:1630]
EIF4EBP1	2.29346	0.00267609	eukaryotic translation initiation factor 4E binding protein 1 [Source:HGNC Symbol;Acc:HGNC:3288]
ARRDC3	2.29142	0	arrestin domain containing 3 [Source:HGNC Symbol;Acc:HGNC:29263]
PTOV1	2.29001	0.0142017	prostate tumor overexpressed 1 [Source:HGNC Symbol;Acc:HGNC:9632]
SLC2A4RG	2.28953	0.0149517	SLC2A4 regulator [Source:HGNC Symbol;Acc:HGNC:15930]
INF2	2.28734	5.27905e-05	inverted formin, FH2 and WH2 domain containing [Source:HGNC Symbol;Acc:HGNC:23791]
ABCA2	2.2739	0.0484374	ATP binding cassette subfamily A member 2 [Source:HGNC Symbol;Acc:HGNC:32]
KLF16	2.27062	0.0431699	Kruppel like factor 16 [Source:HGNC Symbol;Acc:HGNC:16857]
PTGES2	2.26712	0.00459185	prostaglandin E synthase 2 [Source:HGNC Symbol;Acc:HGNC:17822]
RPL8	2.2544	0.000387474	ribosomal protein L8 [Source:HGNC Symbol;Acc:HGNC:10368]
RRP9	2.25437	0.00138763	ribosomal RNA processing 9, small subunit (SSU) processome component, homolog (yeast) [Source:HGNC Symbol;Acc:HGNC:16829]
GEM	2.25421	0	GTP binding protein overexpressed in skeletal muscle [Source:HGNC Symbol;Acc:HGNC:4234]
MAFF	2.24954	1.16288e-10	MAF bZIP transcription factor F [Source:HGNC Symbol;Acc:HGNC:6780]
DLG4	2.24908	0.000309972	discs large MAGUK scaffold protein 4 [Source:HGNC Symbol;Acc:HGNC:2903]
SHB	2.24523	7.11778e-06	SH2 domain containing adaptor protein B [Source:HGNC Symbol;Acc:HGNC:10838]
MAD1L1	2.23531	0.000751441	MAD1 mitotic arrest deficient like 1 [Source:HGNC Symbol;Acc:HGNC:6762]
ADRM1	2.23326	0.0160746	adhesion regulating molecule 1 [Source:HGNC Symbol;Acc:HGNC:15759]
G6PD	2.22323	0.0308452	glucose-6-phosphate dehydrogenase [Source:HGNC Symbol;Acc:HGNC:4057]
SLC25A39	2.21837	0.0388957	solute carrier family 25 member 39 [Source:HGNC Symbol;Acc:HGNC:24279]
INSIG1	2.21102	0	insulin induced gene 1 [Source:HGNC Symbol;Acc:HGNC:6083]
YIF1B	2.20524	0.0101868	Yip1 interacting factor homolog B, membrane trafficking protein [Source:HGNC Symbol;Acc:HGNC:30511]
PORCN	2.20133	0.0268249	porcupine homolog (Drosophila) [Source:HGNC Symbol;Acc:HGNC:17652]
HMGA1	2.19217	1.10138e-06	high mobility group AT-hook 1 [Source:HGNC Symbol;Acc:HGNC:5010]
PFKL	2.19013	0.00352707	phosphofructokinase, liver type [Source:HGNC Symbol;Acc:HGNC:8876]
GPS1	2.18877	0.000464528	G protein pathway suppressor 1 [Source:HGNC Symbol;Acc:HGNC:4549]
FARSA	2.18145	0.0075831	phenylalanyl-tRNA synthetase alpha subunit [Source:HGNC Symbol;Acc:HGNC:3592]
DVL2	2.17144	1.89775e-05	dishevelled segment polarity protein 2 [Source:HGNC Symbol;Acc:HGNC:3086]
DUSP4	2.1591	0	dual specificity phosphatase 4 [Source:HGNC Symbol;Acc:HGNC:3070]
AC023632.6	2.15728	0.0115546
MCM5	2.15363	0.00021169	minichromosome maintenance complex component 5 [Source:HGNC Symbol;Acc:HGNC:6948]
ARHGEF18	2.14628	1.25224e-05	Rho/Rac guanine nucleotide exchange factor 18 [Source:HGNC Symbol;Acc:HGNC:17090]
CDC34	2.1354	0.0398199	cell division cycle 34 [Source:HGNC Symbol;Acc:HGNC:1734]
CYC1	2.13289	0.00246275	cytochrome c1 [Source:HGNC Symbol;Acc:HGNC:2579]
PUF60	2.1299	0.00764043	poly(U) binding splicing factor 60 [Source:HGNC Symbol;Acc:HGNC:17042]
EEF1D	2.11511	1.34085e-06	eukaryotic translation elongation factor 1 delta [Source:HGNC Symbol;Acc:HGNC:3211]
PPP1R14B	2.11447	0.00616965	protein phosphatase 1 regulatory inhibitor subunit 14B [Source:HGNC Symbol;Acc:HGNC:9057]
TRMT1	2.11262	0.0149363	tRNA methyltransferase 1 [Source:HGNC Symbol;Acc:HGNC:25980]
CD68	2.11209	2.95123e-06	CD68 molecule [Source:HGNC Symbol;Acc:HGNC:1693]
SLC25A25	2.10326	0.000195454	solute carrier family 25 member 25 [Source:HGNC Symbol;Acc:HGNC:20663]
ZFAND2B	2.10165	0.0288908	zinc finger AN1-type containing 2B [Source:HGNC Symbol;Acc:HGNC:25206]
DDIT4	2.09091	0	DNA damage inducible transcript 4 [Source:HGNC Symbol;Acc:HGNC:24944]
PRAG1	2.08925	0.00281214	PEAK1 related kinase activating pseudokinase 1 [Source:HGNC Symbol;Acc:HGNC:25438]
TOMM40	2.08614	0.000210094	translocase of outer mitochondrial membrane 40 [Source:HGNC Symbol;Acc:HGNC:18001]
MRPS2	2.08601	0.0346137	mitochondrial ribosomal protein S2 [Source:HGNC Symbol;Acc:HGNC:14495]
TIPARP	2.0854	0	TCDD inducible poly(ADP-ribose) polymerase [Source:HGNC Symbol;Acc:HGNC:23696]
FOSL1	2.07977	0	FOS like 1, AP-1 transcription factor subunit [Source:HGNC Symbol;Acc:HGNC:13718]
ITPR3	2.07868	3.05746e-07	inositol 1,4,5-trisphosphate receptor type 3 [Source:HGNC Symbol;Acc:HGNC:6182]
RUSC2	2.07816	0.0129553	RUN and SH3 domain containing 2 [Source:HGNC Symbol;Acc:HGNC:23625]
EEF2	2.07034	3.67226e-10	eukaryotic translation elongation factor 2 [Source:HGNC Symbol;Acc:HGNC:3214]
PRICKLE1	2.07006	0.00419068	prickle planar cell polarity protein 1 [Source:HGNC Symbol;Acc:HGNC:17019]
PLEKHM2	2.06896	0.00692344	pleckstrin homology and RUN domain containing M2 [Source:HGNC Symbol;Acc:HGNC:29131]
PLXNB2	2.06421	0.000442364	plexin B2 [Source:HGNC Symbol;Acc:HGNC:9104]
TRAF7	2.06096	0.0128258	TNF receptor associated factor 7 [Source:HGNC Symbol;Acc:HGNC:20456]
EFEMP2	2.05723	0.00526203	EGF containing fibulin like extracellular matrix protein 2 [Source:HGNC Symbol;Acc:HGNC:3219]
BCAR3	2.05595	0	breast cancer anti-estrogen resistance 3 [Source:HGNC Symbol;Acc:HGNC:973]
TXNIP	2.05437	0	thioredoxin interacting protein [Source:HGNC Symbol;Acc:HGNC:16952]
GPX4	2.04177	0.0241391	glutathione peroxidase 4 [Source:HGNC Symbol;Acc:HGNC:4556]
SMTN	2.03829	0.0345208	smoothelin [Source:HGNC Symbol;Acc:HGNC:11126]
NFIL3	2.03664	0	nuclear factor, interleukin 3 regulated [Source:HGNC Symbol;Acc:HGNC:7787]
GRK6	2.03362	0.011521	G protein-coupled receptor kinase 6 [Source:HGNC Symbol;Acc:HGNC:4545]
BCL6	2.03198	8.03393e-05	B-cell CLL/lymphoma 6 [Source:HGNC Symbol;Acc:HGNC:1001]
ZNF787	2.02684	0.0392445	zinc finger protein 787 [Source:HGNC Symbol;Acc:HGNC:26998]
MAP2K2	2.0252	0.0490325	mitogen-activated protein kinase kinase 2 [Source:HGNC Symbol;Acc:HGNC:6842]
THOP1	2.02154	0.00786233	thimet oligopeptidase 1 [Source:HGNC Symbol;Acc:HGNC:11793]
DRAP1	2.02108	0.00745837	DR1 associated protein 1 [Source:HGNC Symbol;Acc:HGNC:3019]
KCNJ2	2.01769	0.00151018	potassium voltage-gated channel subfamily J member 2 [Source:HGNC Symbol;Acc:HGNC:6263]
MYBBP1A	2.01482	7.28215e-05	MYB binding protein 1a [Source:HGNC Symbol;Acc:HGNC:7546]
PRMT1	2.01104	0.00956964	protein arginine methyltransferase 1 [Source:HGNC Symbol;Acc:HGNC:5187]
LMAN2	2.01021	0.00459631	lectin, mannose binding 2 [Source:HGNC Symbol;Acc:HGNC:16986]
NEAT1	2.00906	0	nuclear paraspeckle assembly transcript 1 (non-protein coding) [Source:HGNC Symbol;Acc:HGNC:30815]
TRIB1	2.00495	6.70744e-06	tribbles pseudokinase 1 [Source:HGNC Symbol;Acc:HGNC:16891]

## Sheet: 2DG+Phen-DOWN
Gene_Name	Fold change	Bonferroni p-value	Description
CBSL	-82.8781	0	cystathionine-beta-synthase like [Source:HGNC Symbol;Acc:HGNC:51829]
ZNF547	-7.02625	0	zinc finger protein 547 [Source:HGNC Symbol;Acc:HGNC:26432]
ZNF816-ZNF321P	-4.6434	0.0304156	ZNF816-ZNF321P readthrough [Source:HGNC Symbol;Acc:HGNC:38879]
AL109811.3	-4.33612	0.0200915
ZBED8	-4.28984	0	zinc finger BED-type containing 8 [Source:HGNC Symbol;Acc:HGNC:30804]
BCDIN3D	-3.99535	7.34452e-11	BCDIN3 domain containing RNA methyltransferase [Source:HGNC Symbol;Acc:HGNC:27050]
ZNF658	-3.84429	1.94691e-08	zinc finger protein 658 [Source:HGNC Symbol;Acc:HGNC:25226]
ZNF132	-3.54809	3.1512e-06	zinc finger protein 132 [Source:HGNC Symbol;Acc:HGNC:12916]
PPP1R10	-3.51675	0	protein phosphatase 1 regulatory subunit 10 [Source:HGNC Symbol;Acc:HGNC:9284]
PSMD6-AS2	-3.47761	5.69278e-05	PSMD6 antisense RNA 2 [Source:HGNC Symbol;Acc:HGNC:44125]
ZNF607	-3.39442	1.22409e-11	zinc finger protein 607 [Source:HGNC Symbol;Acc:HGNC:28192]
ZNF181	-3.30353	8.01777e-10	zinc finger protein 181 [Source:HGNC Symbol;Acc:HGNC:12971]
ZNF681	-3.2736	2.99901e-10	zinc finger protein 681 [Source:HGNC Symbol;Acc:HGNC:26457]
PI15	-3.2367	0	peptidase inhibitor 15 [Source:HGNC Symbol;Acc:HGNC:8946]
ZNF594	-3.14968	3.95992e-09	zinc finger protein 594 [Source:HGNC Symbol;Acc:HGNC:29392]
AL050341.2	-3.04015	0.0198348
ZNF287	-3.00944	9.04233e-08	zinc finger protein 287 [Source:HGNC Symbol;Acc:HGNC:13502]
MT-ND6	-2.93098	0	mitochondrially encoded NADH:ubiquinone oxidoreductase core subunit 6 [Source:HGNC Symbol;Acc:HGNC:7462]
ZNF253	-2.90137	4.41479e-07	zinc finger protein 253 [Source:HGNC Symbol;Acc:HGNC:13497]
PCF11	-2.88206	0	PCF11 cleavage and polyadenylation factor subunit [Source:HGNC Symbol;Acc:HGNC:30097]
ZNF552	-2.86884	2.18542e-07	zinc finger protein 552 [Source:HGNC Symbol;Acc:HGNC:26135]
BBS12	-2.84915	0.000250496	Bardet-Biedl syndrome 12 [Source:HGNC Symbol;Acc:HGNC:26648]
LINC00909	-2.8055	6.24958e-08	long intergenic non-protein coding RNA 909 [Source:HGNC Symbol;Acc:HGNC:44331]
SFT2D3	-2.74572	0.00013705	SFT2 domain containing 3 [Source:HGNC Symbol;Acc:HGNC:28767]
ZSWIM3	-2.7383	2.94884e-05	zinc finger SWIM-type containing 3 [Source:HGNC Symbol;Acc:HGNC:16157]
EIF5	-2.69534	0	eukaryotic translation initiation factor 5 [Source:HGNC Symbol;Acc:HGNC:3299]
ZC3HAV1	-2.65522	0	zinc finger CCCH-type containing, antiviral 1 [Source:HGNC Symbol;Acc:HGNC:23721]
AP003119.3	-2.64218	0.000443145
ZNF416	-2.63037	0.00302044	zinc finger protein 416 [Source:HGNC Symbol;Acc:HGNC:20645]
FAM214A	-2.6029	1.4383e-09	family with sequence similarity 214 member A [Source:HGNC Symbol;Acc:HGNC:25609]
MT-RNR1	-2.59542	0	mitochondrially encoded 12S RNA [Source:HGNC Symbol;Acc:HGNC:7470]
TIGD1	-2.59284	4.85161e-05	tigger transposable element derived 1 [Source:HGNC Symbol;Acc:HGNC:14523]
ZNF14	-2.57172	0.00028781	zinc finger protein 14 [Source:HGNC Symbol;Acc:HGNC:12924]
TTC30B	-2.55711	9.26431e-06	tetratricopeptide repeat domain 30B [Source:HGNC Symbol;Acc:HGNC:26425]
TUBD1	-2.53423	4.27443e-06	tubulin delta 1 [Source:HGNC Symbol;Acc:HGNC:16811]
PPP1R3D	-2.51977	1.46418e-05	protein phosphatase 1 regulatory subunit 3D [Source:HGNC Symbol;Acc:HGNC:9294]
ZNF737	-2.50656	0.00293874	zinc finger protein 737 [Source:HGNC Symbol;Acc:HGNC:32468]
ZNF200	-2.47789	5.03467e-08	zinc finger protein 200 [Source:HGNC Symbol;Acc:HGNC:12993]
PEX12	-2.47374	1.88279e-05	peroxisomal biogenesis factor 12 [Source:HGNC Symbol;Acc:HGNC:8854]
PNRC2	-2.45276	0	proline rich nuclear receptor coactivator 2 [Source:HGNC Symbol;Acc:HGNC:23158]
ZNF256	-2.44303	0.00103097	zinc finger protein 256 [Source:HGNC Symbol;Acc:HGNC:13049]
RBM12B	-2.43138	0	RNA binding motif protein 12B [Source:HGNC Symbol;Acc:HGNC:32310]
MT-ND5	-2.42554	0	mitochondrially encoded NADH:ubiquinone oxidoreductase core subunit 5 [Source:HGNC Symbol;Acc:HGNC:7461]
ZNF613	-2.38539	0.000429531	zinc finger protein 613 [Source:HGNC Symbol;Acc:HGNC:25827]
MIR22HG	-2.38527	4.62277e-08	MIR22 host gene [Source:HGNC Symbol;Acc:HGNC:28219]
ZNF283	-2.38351	0.000117904	zinc finger protein 283 [Source:HGNC Symbol;Acc:HGNC:13077]
METTL18	-2.36526	0.000136104	methyltransferase like 18 [Source:HGNC Symbol;Acc:HGNC:28793]
OTUD6B-AS1	-2.35213	0	OTUD6B antisense RNA 1 (head to head) [Source:HGNC Symbol;Acc:HGNC:50466]
PARS2	-2.31767	0.000503317	prolyl-tRNA synthetase 2, mitochondrial (putative) [Source:HGNC Symbol;Acc:HGNC:30563]
MBTD1	-2.3159	2.44817e-11	mbt domain containing 1 [Source:HGNC Symbol;Acc:HGNC:19866]
ZFP62	-2.31546	9.56624e-09	ZFP62 zinc finger protein [Source:HGNC Symbol;Acc:HGNC:23241]
ASTE1	-2.25838	9.25934e-05	asteroid homolog 1 (Drosophila) [Source:HGNC Symbol;Acc:HGNC:25021]
ZNF566	-2.25354	2.44292e-06	zinc finger protein 566 [Source:HGNC Symbol;Acc:HGNC:25919]
ZNF28	-2.25143	1.78105e-09	zinc finger protein 28 [Source:HGNC Symbol;Acc:HGNC:13073]
IFRD1	-2.23887	0	interferon related developmental regulator 1 [Source:HGNC Symbol;Acc:HGNC:5456]
MT-RNR2	-2.23213	0	mitochondrially encoded 16S RNA [Source:HGNC Symbol;Acc:HGNC:7471]
ZKSCAN3	-2.22509	0.000595467	zinc finger with KRAB and SCAN domains 3 [Source:HGNC Symbol;Acc:HGNC:13853]
DISP1	-2.22408	0.00103349	dispatched RND transporter family member 1 [Source:HGNC Symbol;Acc:HGNC:19711]
ZNF226	-2.20655	0.000169432	zinc finger protein 226 [Source:HGNC Symbol;Acc:HGNC:13019]
VAV3	-2.18021	0	vav guanine nucleotide exchange factor 3 [Source:HGNC Symbol;Acc:HGNC:12659]
LYSMD3	-2.17606	0	LysM domain containing 3 [Source:HGNC Symbol;Acc:HGNC:26969]
ZIK1	-2.16921	5.11161e-07	zinc finger protein interacting with K protein 1 [Source:HGNC Symbol;Acc:HGNC:33104]
SENP8	-2.15874	0.0372629	SUMO/sentrin peptidase family member, NEDD8 specific [Source:HGNC Symbol;Acc:HGNC:22992]
MTERF2	-2.15662	0.0369169	mitochondrial transcription termination factor 2 [Source:HGNC Symbol;Acc:HGNC:30779]
THAP10	-2.14998	0.00386871	THAP domain containing 10 [Source:HGNC Symbol;Acc:HGNC:23193]
LCMT2	-2.1428	2.84221e-06	leucine carboxyl methyltransferase 2 [Source:HGNC Symbol;Acc:HGNC:17558]
FBXO33	-2.14222	7.22377e-07	F-box protein 33 [Source:HGNC Symbol;Acc:HGNC:19833]
ZNF224	-2.14106	7.69248e-05	zinc finger protein 224 [Source:HGNC Symbol;Acc:HGNC:13017]
HEXIM1	-2.14069	2.07544e-08	hexamethylene bisacetamide inducible 1 [Source:HGNC Symbol;Acc:HGNC:24953]
STON1	-2.14044	5.24722e-05	stonin 1 [Source:HGNC Symbol;Acc:HGNC:17003]
FAM172A	-2.13353	1.51297e-08	family with sequence similarity 172 member A [Source:HGNC Symbol;Acc:HGNC:25365]
SLC2A12	-2.13127	0.00741072	solute carrier family 2 member 12 [Source:HGNC Symbol;Acc:HGNC:18067]
ANKRA2	-2.12865	0.00545514	ankyrin repeat family A member 2 [Source:HGNC Symbol;Acc:HGNC:13208]
ZNF302	-2.12053	4.65092e-08	zinc finger protein 302 [Source:HGNC Symbol;Acc:HGNC:13848]
ZNF470	-2.1193	0.00818908	zinc finger protein 470 [Source:HGNC Symbol;Acc:HGNC:22220]
RNASEL	-2.11662	5.57833e-06	ribonuclease L [Source:HGNC Symbol;Acc:HGNC:10050]
FAM13B	-2.11645	0	family with sequence similarity 13 member B [Source:HGNC Symbol;Acc:HGNC:1335]
NMRAL2P	-2.10534	0	NmrA like redox sensor 2, pseudogene [Source:HGNC Symbol;Acc:HGNC:52332]
ZBED5	-2.09676	0	zinc finger BED-type containing 5 [Source:HGNC Symbol;Acc:HGNC:30803]
HNRNPA1L2	-2.0922	0.02892	heterogeneous nuclear ribonucleoprotein A1-like 2 [Source:HGNC Symbol;Acc:HGNC:27067]
ZNF85	-2.08606	0.00280504	zinc finger protein 85 [Source:HGNC Symbol;Acc:HGNC:13160]
COL1A2	-2.08216	0	collagen type I alpha 2 chain [Source:HGNC Symbol;Acc:HGNC:2198]
SEMA6D	-2.07866	5.81861e-05	semaphorin 6D [Source:HGNC Symbol;Acc:HGNC:16770]
RANBP6	-2.0707	0	RAN binding protein 6 [Source:HGNC Symbol;Acc:HGNC:9851]
RASA2	-2.06673	3.95338e-06	RAS p21 protein activator 2 [Source:HGNC Symbol;Acc:HGNC:9872]
PDCD4	-2.06134	2.38556e-07	programmed cell death 4 [Source:HGNC Symbol;Acc:HGNC:8763]
AC015813.6	-2.06052	0.0270026
TMEM168	-2.05933	6.15354e-05	transmembrane protein 168 [Source:HGNC Symbol;Acc:HGNC:25826]
WDR37	-2.04211	8.8699e-05	WD repeat domain 37 [Source:HGNC Symbol;Acc:HGNC:31406]
LIG4	-2.04039	7.57649e-07	DNA ligase 4 [Source:HGNC Symbol;Acc:HGNC:6601]
TTC30A	-2.02597	4.34232e-05	tetratricopeptide repeat domain 30A [Source:HGNC Symbol;Acc:HGNC:25853]
RBBP6	-2.01906	0	RB binding protein 6, ubiquitin ligase [Source:HGNC Symbol;Acc:HGNC:9889]
ZUFSP	-2.01615	0.00766304	zinc finger with UFM1 specific peptidase domain [Source:HGNC Symbol;Acc:HGNC:21224]
ZNF772	-2.01547	0.0489026	zinc finger protein 772 [Source:HGNC Symbol;Acc:HGNC:33106]
MTF2	-2.00626	0	metal response element binding transcription factor 2 [Source:HGNC Symbol;Acc:HGNC:29535]
ZFP30	-2.00158	0.000137346	ZFP30 zinc finger protein [Source:HGNC Symbol;Acc:HGNC:29555]

## Sheet: GH+Phen-UP
Gene_Name	Fold change	Bonferroni p-value	Description
CHAC1	13.145	4.38756e-07	ChaC glutathione specific gamma-glutamylcyclotransferase 1 [Source:HGNC Symbol;Acc:HGNC:28680]
AC012181.2	7.32107	0.00267739
GDF15	5.25537	1.24814e-05	growth differentiation factor 15 [Source:HGNC Symbol;Acc:HGNC:30142]
HSPA6	5.15589	0.00101706	heat shock protein family A (Hsp70) member 6 [Source:HGNC Symbol;Acc:HGNC:5239]
SPRY2	4.75309	0	sprouty RTK signaling antagonist 2 [Source:HGNC Symbol;Acc:HGNC:11270]
ANKRD1	3.9551	4.15578e-09	ankyrin repeat domain 1 [Source:HGNC Symbol;Acc:HGNC:15819]
DDIT3	3.78371	0	DNA damage inducible transcript 3 [Source:HGNC Symbol;Acc:HGNC:2726]
HERPUD1	3.71681	0	homocysteine inducible ER protein with ubiquitin like domain 1 [Source:HGNC Symbol;Acc:HGNC:13744]
RND3	3.52232	0	Rho family GTPase 3 [Source:HGNC Symbol;Acc:HGNC:671]
DUSP1	3.34501	0	dual specificity phosphatase 1 [Source:HGNC Symbol;Acc:HGNC:3064]
PPP1R15A	3.27063	0	protein phosphatase 1 regulatory subunit 15A [Source:HGNC Symbol;Acc:HGNC:14375]
GADD45A	3.15792	0	growth arrest and DNA damage inducible alpha [Source:HGNC Symbol;Acc:HGNC:4095]
ZNF460	2.95527	0.0300153	zinc finger protein 460 [Source:HGNC Symbol;Acc:HGNC:21628]
DUSP5	2.81547	8.61141e-06	dual specificity phosphatase 5 [Source:HGNC Symbol;Acc:HGNC:3071]
LIF	2.79567	1.78288e-08	LIF, interleukin 6 family cytokine [Source:HGNC Symbol;Acc:HGNC:6596]
SIK1	2.75234	4.59107e-06	salt inducible kinase 1 [Source:HGNC Symbol;Acc:HGNC:11142]
MYC	2.64925	0	MYC proto-oncogene, bHLH transcription factor [Source:HGNC Symbol;Acc:HGNC:7553]
CTGF	2.64759	0	connective tissue growth factor [Source:HGNC Symbol;Acc:HGNC:2500]
KLF6	2.60763	0	Kruppel like factor 6 [Source:HGNC Symbol;Acc:HGNC:2235]
SNAI2	2.55237	0	snail family transcriptional repressor 2 [Source:HGNC Symbol;Acc:HGNC:11094]
DUSP4	2.45324	0	dual specificity phosphatase 4 [Source:HGNC Symbol;Acc:HGNC:3070]
EPHA2	2.39464	8.44284e-05	EPH receptor A2 [Source:HGNC Symbol;Acc:HGNC:3386]
DNAJB9	2.33596	2.2462e-09	DnaJ heat shock protein family (Hsp40) member B9 [Source:HGNC Symbol;Acc:HGNC:6968]
MAFF	2.31509	1.12857e-06	MAF bZIP transcription factor F [Source:HGNC Symbol;Acc:HGNC:6780]
SLC25A25	2.31395	0.0117337	solute carrier family 25 member 25 [Source:HGNC Symbol;Acc:HGNC:20663]
HSPA1B	2.30436	3.77264e-08	heat shock protein family A (Hsp70) member 1B [Source:HGNC Symbol;Acc:HGNC:5233]
ZFP36L1	2.30313	0	ZFP36 ring finger protein like 1 [Source:HGNC Symbol;Acc:HGNC:1107]
INHBA	2.23476	0.000793549	inhibin beta A subunit [Source:HGNC Symbol;Acc:HGNC:6066]
HSPA5	2.23103	0	heat shock protein family A (Hsp70) member 5 [Source:HGNC Symbol;Acc:HGNC:5238]
FAM46C	2.22786	0.0308316	family with sequence similarity 46 member C [Source:HGNC Symbol;Acc:HGNC:24712]
ARL4C	2.20292	0	ADP ribosylation factor like GTPase 4C [Source:HGNC Symbol;Acc:HGNC:698]
BDNF	2.19995	7.83871e-06	brain derived neurotrophic factor [Source:HGNC Symbol;Acc:HGNC:1033]
HSPA1A	2.17677	0.00207574	heat shock protein family A (Hsp70) member 1A [Source:HGNC Symbol;Acc:HGNC:5232]
GEM	2.16391	0	GTP binding protein overexpressed in skeletal muscle [Source:HGNC Symbol;Acc:HGNC:4234]
PMAIP1	2.16224	6.01682e-07	phorbol-12-myristate-13-acetate-induced protein 1 [Source:HGNC Symbol;Acc:HGNC:9108]
ARHGEF18	2.16145	0.00101284	Rho/Rac guanine nucleotide exchange factor 18 [Source:HGNC Symbol;Acc:HGNC:17090]
DUSP10	2.16132	0	dual specificity phosphatase 10 [Source:HGNC Symbol;Acc:HGNC:3065]
BCL6	2.13484	0.00619872	B-cell CLL/lymphoma 6 [Source:HGNC Symbol;Acc:HGNC:1001]
BHLHE40	2.13469	6.12044e-12	basic helix-loop-helix family member e40 [Source:HGNC Symbol;Acc:HGNC:1046]
SLC16A6	2.08917	1.07811e-05	solute carrier family 16 member 6 [Source:HGNC Symbol;Acc:HGNC:10927]
CYR61	2.07899	0	cysteine rich angiogenic inducer 61 [Source:HGNC Symbol;Acc:HGNC:2654]
IRS2	2.07707	3.01507e-05	insulin receptor substrate 2 [Source:HGNC Symbol;Acc:HGNC:6126]
ADRB2	2.06485	0.000922566	adrenoceptor beta 2 [Source:HGNC Symbol;Acc:HGNC:286]
DKK1	2.05605	0	dickkopf WNT signaling pathway inhibitor 1 [Source:HGNC Symbol;Acc:HGNC:2891]
BCAR3	2.03239	1.6494e-07	breast cancer anti-estrogen resistance 3 [Source:HGNC Symbol;Acc:HGNC:973]
JUN	2.02458	2.72991e-06	Jun proto-oncogene, AP-1 transcription factor subunit [Source:HGNC Symbol;Acc:HGNC:6204]
RNF169	2.02289	8.03613e-09	ring finger protein 169 [Source:HGNC Symbol;Acc:HGNC:26961]

## Sheet: GH+Phen-DOWN
Gene_Name	Fold change	Bonferroni p-value	Description
TXNIP	-34.6781	0	thioredoxin interacting protein [Source:HGNC Symbol;Acc:HGNC:16952]
AC008878.3	-13.1468	1.23566e-07
ARRDC4	-5.13655	0	arrestin domain containing 4 [Source:HGNC Symbol;Acc:HGNC:28087]
AC021097.1	-4.26791	0.00710148
ZNF547	-3.99913	0.000159749	zinc finger protein 547 [Source:HGNC Symbol;Acc:HGNC:26432]
MT-RNR1	-3.1036	0	mitochondrially encoded 12S RNA [Source:HGNC Symbol;Acc:HGNC:7470]
ZNF551	-3.01475	1.44663e-07	zinc finger protein 551 [Source:HGNC Symbol;Acc:HGNC:25108]
PI15	-2.82951	0	peptidase inhibitor 15 [Source:HGNC Symbol;Acc:HGNC:8946]
ZNF772	-2.59997	0.00643081	zinc finger protein 772 [Source:HGNC Symbol;Acc:HGNC:33106]
MT-ND6	-2.59079	0	mitochondrially encoded NADH:ubiquinone oxidoreductase core subunit 6 [Source:HGNC Symbol;Acc:HGNC:7462]
ZNF253	-2.5879	0.0110042	zinc finger protein 253 [Source:HGNC Symbol;Acc:HGNC:13497]
MT-RNR2	-2.43119	0	mitochondrially encoded 16S RNA [Source:HGNC Symbol;Acc:HGNC:7471]
RGS2	-2.42275	0.000390952	regulator of G protein signaling 2 [Source:HGNC Symbol;Acc:HGNC:9998]
BAMBI	-2.36336	0	BMP and activin membrane bound inhibitor [Source:HGNC Symbol;Acc:HGNC:30251]
BMF	-2.16946	0.0453285	Bcl2 modifying factor [Source:HGNC Symbol;Acc:HGNC:24132]
SEMA6D	-2.13757	0.0199567	semaphorin 6D [Source:HGNC Symbol;Acc:HGNC:16770]
MT-ND5	-2.12838	0	mitochondrially encoded NADH:ubiquinone oxidoreductase core subunit 5 [Source:HGNC Symbol;Acc:HGNC:7461]
SNHG3	-2.11833	2.48503e-05	small nucleolar RNA host gene 3 [Source:HGNC Symbol;Acc:HGNC:10118]
ZC3HAV1	-2.05754	0	zinc finger CCCH-type containing, antiviral 1 [Source:HGNC Symbol;Acc:HGNC:23721]
ZNF134	-2.04484	0.00401571	zinc finger protein 134 [Source:HGNC Symbol;Acc:HGNC:12918]
