# Supplementary material for: The Oligostilbene Gnetin H Is a Novel Glycolysis Inhibitor That Regulates Thioredoxin Interacting Protein Expression and Synergizes with OXPHOS Inhibitor in Cancer Cells
Source: Int J Mol Sci. 2023 Apr 23;24(9):7741. doi: 10.3390/ijms24097741 (PMC10178141; doi:10.3390/ijms24097741)
Supplement: Supplementary file 1 [file ijms-24-07741-s001.zip › ijms-2252267-Table S2-resub.xlsx]

## Sheet: 2DG-UP - GO-Analysis
GO Biological Process	Fold enrichment of GO category	FDR p -value
positive regulation of transcription from RNA polymerase II promoter in response to endoplasmic reticulum stress (GO:1990440)	17.47	0.0276
negative regulation of glycolytic process (GO:0045820)	14.97	0.0401
positive regulation of transcription from RNA polymerase II promoter in response to stress (GO:0036003)	14.11	0.000966
intrinsic apoptotic signaling pathway in response to endoplasmic reticulum stress (GO:0070059)	11.12	0.00258
negative regulation of ATP metabolic process (GO:1903579)	9.7	0.0401
regulation of transcription from RNA polymerase II promoter in response to stress (GO:0043618)	8.56	0.00299
protein kinase B signaling (GO:0043491)	8.27	0.0255
cellular response to glucose starvation (GO:0042149)	7.64	0.0134
regulation of DNA-templated transcription in response to stress (GO:0043620)	7.62	0.00537
ribosome assembly (GO:0042255)	6.87	0.00936
positive regulation of neuron apoptotic process (GO:0043525)	6.44	0.0282
positive regulation of apoptotic signaling pathway (GO:2001235)	4.73	0.00924
intrinsic apoptotic signaling pathway (GO:0097193)	4.6	0.00309
regulation of peptidyl-serine phosphorylation (GO:0033135)	3.98	0.0272
response to starvation (GO:0042594)	3.69	0.0103

## Sheet: 2DG+Phen-UP - GO-Analysis
GO Biological Process	Fold enrichment of GO category	FDR p -value
polyamine catabolic process (GO:0006598)	79.21	0.00392
nerve growth factor signaling pathway (GO:0038180)	26.4	0.0283
neurotrophin signaling pathway (GO:0038179)	21.12	0.00137
peptidyl-threonine dephosphorylation (GO:0035970)	18.37	0.0126
ERK1 and ERK2 cascade (GO:0070371)	17.03	0.00305
regulation of anoikis (GO:2000209)	16.9	0.0157
temperature homeostasis (GO:0001659)	14.57	0.0231
protein kinase B signaling (GO:0043491)	13.9	0.00652
intrinsic apoptotic signaling pathway in response to endoplasmic reticulum stress (GO:0070059)	12.8	0.0308
negative regulation of G protein-coupled receptor signaling pathway (GO:0045744)	10.78	0.0158
positive regulation of myeloid leukocyte differentiation (GO:0002763)	9.1	0.027
ribosome assembly (GO:0042255)	8.66	0.0308
regulation of steroid biosynthetic process (GO:0050810)	8.25	0.0359
cellular response to interleukin-1 (GO:0071347)	7.25	0.00909
regulation of steroid metabolic process (GO:0019218)	6.74	0.0294

## Sheet: 2DG+Phen-DOWN - GO-Analysis
GO Biological Process	Fold enrichment of GO category	FDR p -value
regulation of transcription by RNA polymerase II (GO:0006357)	2.93	3.81e-06
regulation of RNA metabolic process (GO:0051252)	2.64	2.77e-07
regulation of nucleobase-containing compound metabolic process (GO:0019219)	2.59	2.85e-07
regulation of cellular macromolecule biosynthetic process (GO:2000112)	2.55	3.1e-07
regulation of transcription, DNA-templated (GO:0006355)	2.55	4.3e-06
regulation of nucleic acid-templated transcription (GO:1903506)	2.55	3.9e-06
regulation of RNA biosynthetic process (GO:2001141)	2.54	3.71e-06
regulation of macromolecule biosynthetic process (GO:0010556)	2.53	3.02e-07
regulation of cellular biosynthetic process (GO:0031326)	2.44	9.18e-07
regulation of biosynthetic process (GO:0009889)	2.4	1.99e-06
regulation of gene expression (GO:0010468)	2.23	3.15e-06
regulation of primary metabolic process (GO:0080090)	1.97	4.58e-05
regulation of nitrogen compound metabolic process (GO:0051171)	1.96	0.000113
regulation of cellular metabolic process (GO:0031323)	1.93	5.85e-05
regulation of macromolecule metabolic process (GO:0060255)	1.92	4.29e-05

## Sheet: GH+Phen-UP - GO-Analysis
GO Biological Process	Fold enrichment of GO category	FDR p -value
heat acclimation (GO:0010286)	> 100	0.00741
negative regulation of CREB transcription factor activity (GO:0032792)	> 100	0.00737
positive regulation of nucleotide-binding oligomerization domain containing 2 signaling pathway (GO:0070434)	> 100	0.00733
cellular heat acclimation (GO:0070370)	> 100	0.0073
negative regulation of IRE1-mediated unfolded protein response (GO:1903895)	> 100	0.00726
positive regulation of nucleotide-binding oligomerization domain containing signaling pathway (GO:0070426)	> 100	0.00899
negative regulation of p38MAPK cascade (GO:1903753)	> 100	0.011
positive regulation of microtubule nucleation (GO:0090063)	> 100	0.013
regulation of nucleotide-binding oligomerization domain containing 2 signaling pathway (GO:0070432)	> 100	0.013
protein refolding (GO:0042026)	96.35	3.65e-05
negative regulation of endoplasmic reticulum unfolded protein response (GO:1900102)	85.81	0.000987
positive regulation of tumor necrosis factor-mediated signaling pathway (GO:1903265)	83.21	0.0201
positive regulation of monocyte differentiation (GO:0045657)	83.21	0.0201
positive regulation of endoplasmic reticulum stress-induced intrinsic apoptotic signaling pathway (GO:1902237)	83.21	0.02
negative regulation of multicellular organism growth (GO:0040015)	83.21	0.0199
